# Supplementary material for: Age dependent changes in the LPS induced transcriptome of bovine dermal fibroblasts occurs without major changes in the methylome
Source: PubMed Central journal article supplement (PMC4312471; doi:10.1186/s12864-015-1223-z), 2015-01-27
Supplement: 12864_2015_1223_MOESM3_ESM.pdf [file 12864_2015_1223_MOESM3_ESM.pdf]

**Supplemental Table 3.** Differentially expressed genes (FDR<0.05; CPM>1; 2<FC<-2) between young (5 months) and old (16 months) fibroblast cultures from the same individual exposed to 100 ng/ml LPS for 0, 2, or 8 hours. A positive fold change indicates higher expression in old cultures. CPM = Counts per Million. FDR = False discovery rate.

| <b>Hour 0</b> |                   |                    |            |            |
|---------------|-------------------|--------------------|------------|------------|
| <b>Gene</b>   | <b>Chromosome</b> | <b>Fold Change</b> | <b>CPM</b> | <b>FDR</b> |
| NPY1R         | 6                 | 99.5               | 1.35       | 3.89E-61   |
| GREB1         | 11                | 82.4               | 2.95       | 5.37E-66   |
| ACAN          | 21                | 66.5               | 18.13      | 1.4E-17    |
| DTX4          | 15                | 29.5               | 2.54       | 1.05E-72   |
| LIX1          | 7                 | 28.5               | 1.27       | 0.0000254  |
| LOC100848478  | 4                 | 24.8               | 78.28      | 0.00115    |
| NTS           | 5                 | 16.4               | 3.09       | 1.63E-40   |
| COL8A1        | 1                 | 13.3               | 9.25       | 6.6E-50    |
| MAN1C1        | 2                 | 13.3               | 2.23       | 2.69E-24   |
| FGD5          | 22                | 13                 | 5.83       | 3.08E-77   |
| LOC516579     | 13                | 12.9               | 2.4        | 3.93E-48   |
| SESN3         | 15                | 11.3               | 18.16      | 3.22E-60   |
| SEMA5A        | 20                | 10.7               | 6.85       | 4.17E-27   |
| ARHGDIB       | 5                 | 10.3               | 1.28       | 7.88E-17   |
| ZBTB7C        | 24                | 9.7                | 2.24       | 1.58E-37   |
| AFAP1L2       | 26                | 8.3                | 13.62      | 1.05E-159  |
| PTGIS         | 13                | 8.1                | 34.55      | 5.92E-81   |
| CA13          | 14                | 8                  | 4.38       | 7.94E-15   |
| MASP1         | 1                 | 7.9                | 11.73      | 4.89E-35   |
| MN1           | 17                | 7.8                | 2.03       | 1.72E-28   |
| RARRES1       | 1                 | 7.7                | 54.51      | 9.33E-65   |
| TOX           | 14                | 7.7                | 4.77       | 8.69E-49   |
| BCAS1         | 13                | 7.2                | 3.68       | 3.52E-34   |
| SDK2          | 19                | 7.1                | 2.13       | 4.92E-31   |
| LOC100847493  | 20                | 6.7                | 1.29       | 9.12E-24   |
| LOC100847495  | 23                | 6.7                | 4.06       | 5.73E-42   |
| FES           | 21                | 6.6                | 9.65       | 8.49E-68   |
| LOC512286     | 3                 | 6.6                | 1.01       | 1.5E-13    |
| KCNMB1        | 20                | 6.4                | 3.57       | 1.27E-35   |
| LOC616198     | 9                 | 6                  | 2.14       | 7.78E-27   |
| EXO1          | 16                | 5.8                | 1.53       | 3.55E-11   |
| TNN           | 16                | 5.8                | 3.65       | 1.35E-16   |
| CDC6          | 19                | 5.2                | 1.46       | 1.67E-08   |
| LOC618369     | 5                 | 5.2                | 9.63       | 5.08E-45   |
| MGLL          | 22                | 5.2                | 14.48      | 4.1E-40    |
| SMOC2         | 9                 | 5.2                | 46.96      | 2.33E-15   |

|              |    |     |        |             |
|--------------|----|-----|--------|-------------|
| ELN          | 25 | 4.9 | 409.49 | 3.08E-19    |
| LOC613534    | 6  | 4.8 | 116.57 | 0.00526     |
| PTPRU        | 2  | 4.8 | 4.83   | 2.53E-13    |
| TFAP2A       | 23 | 4.8 | 3.92   | 7.86E-35    |
| CACNA1C      | 5  | 4.7 | 2.14   | 1.04E-21    |
| MARVELD2     | 20 | 4.6 | 1.06   | 6.72E-11    |
| ITIH5        | 13 | 4.5 | 10.44  | 0.0064      |
| E2F8         | 29 | 4.4 | 3.56   | 5.83E-28    |
| CDT1         | 18 | 4.3 | 2.88   | 1.62E-23    |
| ID1          | 13 | 4.3 | 4.71   | 1.77E-30    |
| IL1RL1       | 11 | 4.2 | 15.12  | 5.5E-26     |
| PERP         | 9  | 4.2 | 6.23   | 1.54E-22    |
| LSP1         | 29 | 4.1 | 6.29   | 2.95E-34    |
| CLSPN        | 3  | 4   | 3.61   | 2.8E-21     |
| CPZ          | 6  | 4   | 3.46   | 4.07E-21    |
| CRTAC1       | 26 | 4   | 1.84   | 2.11E-18    |
| DAAM2        | 23 | 4   | 15.73  | 1.12E-23    |
| EGLN3        | 21 | 4   | 9.03   | 4.02E-55    |
| HSD17B14     | 18 | 4   | 2.31   | 1.9E-10     |
| KITLG        | 5  | 4   | 2.31   | 3.09E-15    |
| LOC789200    | 29 | 4   | 1.04   | 4.81E-11    |
| PRSS48       | 17 | 4   | 1.1    | 0.00062     |
| RRM2         | 11 | 4   | 48.67  | 4.09E-83    |
| COL15A1      | 8  | 3.9 | 220.29 | 4.51E-59    |
| BDKRB1       | 21 | 3.8 | 3.09   | 1.04E-08    |
| CYP1A1       | 21 | 3.8 | 9.51   | 6.33E-54    |
| GPR132       | 21 | 3.8 | 2.14   | 8.81E-11    |
| PTPN3        | 8  | 3.8 | 4.9    | 5.4E-28     |
| ITGA7        | 5  | 3.7 | 14.54  | 0.0000596   |
| KCNMA1       | 28 | 3.7 | 4.73   | 5.46E-23    |
| KIF1A        | 3  | 3.7 | 1.97   | 5.85E-10    |
| MOCOS        | 24 | 3.7 | 2.97   | 1.22E-20    |
| ADAMTS16     | 20 | 3.6 | 1.95   | 2.19E-16    |
| LOC100336535 | 19 | 3.6 | 1.07   | 0.000000318 |
| PLCE1        | 26 | 3.6 | 1.5    | 1.07E-12    |
| TCF19        | 23 | 3.6 | 4.86   | 1.43E-28    |
| CARD11       | 25 | 3.4 | 4.04   | 1.79E-10    |
| CD34         | 16 | 3.4 | 4.08   | 2.16E-13    |
| F13A1        | 23 | 3.4 | 431.33 | 3.59E-39    |
| FOXM1        | 5  | 3.4 | 3.77   | 1.29E-22    |
| ST8SIA1      | 5  | 3.4 | 10.88  | 2.89E-38    |
| UHRF1        | 7  | 3.4 | 14.74  | 4.98E-67    |
| CCL2         | 19 | 3.3 | 8.46   | 3.78E-23    |
| CRYAB        | 15 | 3.3 | 43.97  | 4.21E-56    |
| FAM49A       | 11 | 3.3 | 2.33   | 2.9E-15     |

|           |    |     |       |             |
|-----------|----|-----|-------|-------------|
| IL1RL2    | 11 | 3.3 | 1.02  | 0.00128     |
| MEOX2     | 4  | 3.3 | 6.19  | 2.12E-24    |
| P2RY1     | 1  | 3.3 | 1.24  | 1.96E-09    |
| CD1D      | 3  | 3.2 | 2.95  | 0.0000125   |
| CDCA5     | 29 | 3.2 | 3.46  | 6.67E-13    |
| HHIPL1    | 21 | 3.2 | 6.92  | 8.58E-33    |
| MYBL1     | 14 | 3.2 | 4.01  | 1.72E-18    |
| PTPRD     | 8  | 3.2 | 10.4  | 3.71E-30    |
| TSTD1     | 3  | 3.2 | 3.27  | 4.75E-16    |
| FAM105A   | 20 | 3.1 | 2.23  | 1.09E-08    |
| FAM64A    | 19 | 3.1 | 15.3  | 1.97E-56    |
| OLFML1    | 15 | 3.1 | 4.78  | 0.000253    |
| ASF1B     | 7  | 3   | 4.64  | 6.7E-20     |
| ASPM      | 16 | 3   | 26.59 | 8.19E-56    |
| CCNF      | 25 | 3   | 10.72 | 3.47E-44    |
| CDC20     | 3  | 3   | 23.93 | 3.86E-63    |
| DACT2     | 9  | 3   | 4.1   | 6.9E-09     |
| DEPDC1    | 3  | 3   | 5.4   | 1.69E-22    |
| ELMO3     | 18 | 3   | 1.03  | 0.000000226 |
| FAM83D    | 13 | 3   | 5.13  | 1.15E-20    |
| GIMAP4    | 4  | 3   | 1.21  | 0.0000583   |
| IQGAP3    | 3  | 3   | 21.51 | 5.37E-53    |
| KIF20A    | 7  | 3   | 46.55 | 4.47E-41    |
| LOC790886 | 16 | 3   | 5.35  | 5.94E-15    |
| MCM5      | 5  | 3   | 22.23 | 9.06E-63    |
| SAMD11    | 16 | 3   | 1.46  | 0.00663     |
| VAT1L     | 18 | 3   | 14.14 | 0.0000934   |
| CDC25B    | 13 | 2.9 | 16.25 | 1.29E-43    |
| CFH       | 16 | 2.9 | 53.87 | 1.96E-37    |
| CTSO      | 17 | 2.9 | 1.13  | 0.00000693  |
| HJURP     | 3  | 2.9 | 16.59 | 1.23E-44    |
| KIAA0101  | 10 | 2.9 | 10.48 | 2.37E-41    |
| LOC781004 | 16 | 2.9 | 3.87  | 1.95E-15    |
| LOC790886 | 16 | 2.9 | 2.17  | 1.78E-11    |
| MAPK12    | 5  | 2.9 | 4.27  | 1.36E-13    |
| MCM2      | 22 | 2.9 | 20.59 | 2.54E-53    |
| MCM3      | 23 | 2.9 | 17.04 | 8.92E-46    |
| MFSD6     | 2  | 2.9 | 7.65  | 1.7E-27     |
| MT2A      | 18 | 2.9 | 3.49  | 1.8E-11     |
| PRUNE2    | 8  | 2.9 | 20.14 | 1.37E-33    |
| PTPRB     | 5  | 2.9 | 1.67  | 0.0000769   |
| SLC25A13  | 4  | 2.9 | 6.17  | 3.62E-26    |
| ADAMTSL3  | 21 | 2.8 | 3.5   | 9.96E-08    |
| CNTN5     | 15 | 2.8 | 2.54  | 0.00104     |
| ESPL1     | 5  | 2.8 | 17.99 | 6.85E-47    |

|              |    |     |        |             |
|--------------|----|-----|--------|-------------|
| GALNT14      | 11 | 2.8 | 1.13   | 0.0000021   |
| KIF2C        | 3  | 2.8 | 12.99  | 5.24E-45    |
| LOC100299874 | 9  | 2.8 | 1.81   | 6.24E-11    |
| LOC100336690 | 5  | 2.8 | 4.34   | 1.28E-15    |
| MKI67        | 26 | 2.8 | 60.13  | 9.44E-55    |
| POLE         | 17 | 2.8 | 7.7    | 1.77E-28    |
| RECQL4       | 14 | 2.8 | 4.06   | 4.54E-17    |
| TOP2A        | 19 | 2.8 | 66.81  | 1.07E-45    |
| UBE2C        | 13 | 2.8 | 20.1   | 1.46E-36    |
| ZNF423       | 18 | 2.8 | 1.71   | 0.000000172 |
| ABI3BP       | 1  | 2.7 | 214.81 | 0.0000513   |
| BDKRB2       | 21 | 2.7 | 1.77   | 0.00000323  |
| BMPER        | 4  | 2.7 | 2      | 0.00000013  |
| C21H15orf42  | 21 | 2.7 | 4.02   | 2.25E-16    |
| CASC5        | 10 | 2.7 | 21.43  | 6.38E-44    |
| CCL26        | 25 | 2.7 | 2.86   | 0.00000384  |
| CDCA3        | 5  | 2.7 | 11.33  | 6.83E-31    |
| CHTF18       | 25 | 2.7 | 8.39   | 2.79E-29    |
| FADS2        | 29 | 2.7 | 3.55   | 0.00000553  |
| KIF15        | 22 | 2.7 | 6.74   | 2.34E-25    |
| KIF18B       | 19 | 2.7 | 4.92   | 5.83E-19    |
| LOC100847721 | 9  | 2.7 | 5.57   | 1.76E-19    |
| LOC100848911 | 7  | 2.7 | 10.43  | 3.14E-33    |
| LOC508486    | 25 | 2.7 | 2.31   | 7.15E-11    |
| MCM4         | 27 | 2.7 | 12.53  | 5.02E-42    |
| MCM4         | 14 | 2.7 | 11.77  | 2.45E-41    |
| NCAPH        | 11 | 2.7 | 6.88   | 2.01E-19    |
| NKD2         | 20 | 2.7 | 2.04   | 6.2E-10     |
| NLRC5        | 18 | 2.7 | 1.98   | 6.78E-10    |
| NUSAP1       | 10 | 2.7 | 12.27  | 1.96E-38    |
| PCOLCE2      | 1  | 2.7 | 2.99   | 0.0000403   |
| PDZD2        | 20 | 2.7 | 2.56   | 2.87E-11    |
| PRR11        | 19 | 2.7 | 4.77   | 5.47E-17    |
| PTPRR        | 5  | 2.7 | 24.11  | 4.26E-48    |
| RAD54L       | 3  | 2.7 | 5.07   | 1.06E-18    |
| SHCBP1       | 18 | 2.7 | 12.9   | 2.24E-45    |
| TROAP        | 5  | 2.7 | 9.74   | 1.02E-32    |
| CCNA2        | 6  | 2.6 | 19.32  | 1.53E-31    |
| CCNB1        | 20 | 2.6 | 25.44  | 5.02E-42    |
| CDCA7        | 2  | 2.6 | 3.94   | 9.53E-12    |
| CENPF        | 16 | 2.6 | 34.69  | 2.15E-42    |
| CKAP2L       | 11 | 2.6 | 9.6    | 6.81E-26    |
| COL18A1      | 1  | 2.6 | 17.3   | 3.52E-34    |
| FMNL1        | 19 | 2.6 | 4.47   | 6.12E-14    |
| KIFC1        | 23 | 2.6 | 25.66  | 2.29E-46    |

|              |    |     |       |             |
|--------------|----|-----|-------|-------------|
| KNTC1        | 17 | 2.6 | 11.44 | 1.03E-35    |
| LOC512293    | 4  | 2.6 | 2.98  | 9.84E-11    |
| MYBL2        | 13 | 2.6 | 29.92 | 2.36E-47    |
| NEK2         | 16 | 2.6 | 3.81  | 5.58E-13    |
| OIP5         | 10 | 2.6 | 3.48  | 1.86E-11    |
| PLK1         | 25 | 2.6 | 16.39 | 8.75E-37    |
| PMCH         | 5  | 2.6 | 1.44  | 0.000000589 |
| RAD51AP1     | 5  | 2.6 | 2.18  | 9.93E-10    |
| RASGRP2      | 29 | 2.6 | 4.06  | 2.47E-12    |
| SPAG5        | 19 | 2.6 | 17.96 | 7.59E-38    |
| ACVRL1       | 5  | 2.5 | 16.19 | 3.56E-17    |
| ARHGAP11A    | 10 | 2.5 | 8.52  | 5.73E-24    |
| BARD1        | 2  | 2.5 | 2.07  | 0.001       |
| CDKN3        | 10 | 2.5 | 6.63  | 3.3E-19     |
| CENPA        | 11 | 2.5 | 12.02 | 1.96E-33    |
| CENPE        | 6  | 2.5 | 23.72 | 4.98E-45    |
| DLGAP5       | 10 | 2.5 | 16.11 | 8.58E-33    |
| E2F1         | 13 | 2.5 | 5.73  | 2.2E-18     |
| ERCC6L       | X  | 2.5 | 3.37  | 1.3E-11     |
| ESCO2        | 8  | 2.5 | 5.31  | 2.63E-15    |
| FBXO5        | 9  | 2.5 | 2.17  | 0.000000029 |
| KIF11        | 26 | 2.5 | 29.64 | 5.59E-33    |
| LMNB1        | 7  | 2.5 | 18.4  | 3.97E-30    |
| LOC100297676 | 5  | 2.5 | 5.18  | 6.66E-15    |
| LOC100336868 | 16 | 2.5 | 5.28  | 4.55E-13    |
| LOC525353    | 26 | 2.5 | 3.15  | 6.33E-09    |
| LOC786906    | 4  | 2.5 | 1.06  | 0.0000287   |
| LPAR1        | 8  | 2.5 | 1.88  | 0.0000222   |
| MXD3         | 7  | 2.5 | 2.44  | 2.31E-09    |
| NAPRT1       | 14 | 2.5 | 6.17  | 9.07E-16    |
| NCAPG2       | 4  | 2.5 | 19.68 | 1.69E-33    |
| NDC80        | 24 | 2.5 | 11.52 | 3.47E-29    |
| NEIL3        | 27 | 2.5 | 2     | 9.92E-09    |
| NOD2         | 18 | 2.5 | 2.79  | 4.24E-09    |
| PAX2         | 26 | 2.5 | 2.8   | 6.58E-10    |
| SGOL1        | 1  | 2.5 | 3.88  | 2.11E-12    |
| SPC25        | 2  | 2.5 | 3.59  | 1.36E-11    |
| STMN1        | 2  | 2.5 | 38.27 | 1.78E-33    |
| ADAMTS17     | 21 | 2.4 | 5.9   | 2.08E-12    |
| BUB1B        | 10 | 2.4 | 24.35 | 1.44E-37    |
| CCDC99       | 20 | 2.4 | 10.1  | 6.79E-29    |
| CENPT        | 18 | 2.4 | 8.21  | 1.6E-18     |
| CEP55        | 26 | 2.4 | 9.23  | 6.8E-25     |
| CKS2         | 8  | 2.4 | 22.64 | 1.79E-34    |
| FAM180B      | 15 | 2.4 | 2.52  | 0.0000771   |

|              |    |     |       |             |
|--------------|----|-----|-------|-------------|
| GIMAP5       | 4  | 2.4 | 1.52  | 0.000166    |
| HEYL         | 3  | 2.4 | 2.09  | 0.000000137 |
| KIF23        | 10 | 2.4 | 21.84 | 1.33E-36    |
| LOC782598    | 21 | 2.4 | 4.85  | 5.18E-14    |
| NPDC1        | 11 | 2.4 | 6.53  | 7.4E-19     |
| PDE4B        | 3  | 2.4 | 1.95  | 0.000000161 |
| RAI2         | X  | 2.4 | 2.55  | 0.0000205   |
| SMC2         | 8  | 2.4 | 27.49 | 1.32E-43    |
| SNCAIP       | 7  | 2.4 | 1.02  | 0.00155     |
| TACC3        | 6  | 2.4 | 18.47 | 3.89E-38    |
| TONSL        | 14 | 2.4 | 3.49  | 1.81E-11    |
| TRIP13       | 20 | 2.4 | 10.57 | 5.67E-29    |
| TTK          | 9  | 2.4 | 1.37  | 0.000000798 |
| AS3MT        | 26 | 2.3 | 7.72  | 1.4E-20     |
| AURKA        | 13 | 2.3 | 9.82  | 1.5E-24     |
| C1QTNF1      | 19 | 2.3 | 45.01 | 1.04E-35    |
| CCNB2        | 10 | 2.3 | 12.42 | 6.78E-27    |
| CDCA8        | 3  | 2.3 | 9.82  | 1.86E-21    |
| CDKN2C       | 3  | 2.3 | 5.16  | 5.06E-14    |
| CENPN        | 18 | 2.3 | 7.06  | 7.59E-19    |
| CORO2B       | 10 | 2.3 | 16.26 | 2.16E-26    |
| ESM1         | 20 | 2.3 | 28.84 | 3.81E-12    |
| FAM107B      | 13 | 2.3 | 1.28  | 0.00000857  |
| FJX1         | 15 | 2.3 | 1.06  | 0.001       |
| KIAA1199     | 21 | 2.3 | 123.5 | 1.24E-13    |
| KIF20B       | 26 | 2.3 | 9.37  | 2.18E-23    |
| LOC100848128 | 11 | 2.3 | 3.19  | 1.59E-09    |
| LOC782601    | 27 | 2.3 | 1.16  | 0.0000362   |
| LOC783804    | 26 | 2.3 | 2.17  | 0.000000181 |
| MAD2L1       | 6  | 2.3 | 12.71 | 2.5E-31     |
| MAFB         | 13 | 2.3 | 1.39  | 0.00758     |
| MB21D1       | 9  | 2.3 | 1.62  | 0.00000537  |
| MXRA5        | X  | 2.3 | 4.05  | 0.0207      |
| MYLK2        | 13 | 2.3 | 1.43  | 0.000662    |
| NUF2         | 3  | 2.3 | 15.96 | 6.07E-26    |
| OAF          | 15 | 2.3 | 13.08 | 6.49E-09    |
| POLE2        | 10 | 2.3 | 3.26  | 6.82E-09    |
| PRC1         | 21 | 2.3 | 42.47 | 3.24E-34    |
| SCARA5       | 8  | 2.3 | 2.19  | 0.0084      |
| SDK1         | 25 | 2.3 | 29.66 | 2.53E-19    |
| SEMA4A       | 3  | 2.3 | 2.37  | 0.000000101 |
| SLC43A3      | 15 | 2.3 | 4.31  | 0.000000474 |
| UNC5C        | 6  | 2.3 | 16.4  | 2.22E-22    |
| ANXA8L1      | 28 | 2.2 | 13.77 | 2.65E-16    |
| AOX1         | 2  | 2.2 | 92.11 | 0.000319    |

|              |    |     |        |             |
|--------------|----|-----|--------|-------------|
| BIRC5        | 19 | 2.2 | 23.26  | 8.5E-34     |
| BUB1         | 11 | 2.2 | 20.12  | 2.36E-28    |
| C8H9orf100   | 8  | 2.2 | 5.93   | 6.29E-14    |
| CCDC3        | 13 | 2.2 | 28.74  | 1.01E-10    |
| CDCA2        | 8  | 2.2 | 16.02  | 2.13E-29    |
| CDK1         | 28 | 2.2 | 13.62  | 3.07E-28    |
| CHAF1A       | 7  | 2.2 | 8.8    | 1.21E-14    |
| CKAP2        | 12 | 2.2 | 51.02  | 6.41E-34    |
| CST3         | 13 | 2.2 | 140.16 | 6.18E-15    |
| DNA2         | 28 | 2.2 | 2.19   | 0.0000123   |
| FAM54A       | 9  | 2.2 | 7.32   | 2.21E-18    |
| FAM72A       | 16 | 2.2 | 2.74   | 0.000000301 |
| FANCD2       | 22 | 2.2 | 12.41  | 1.6E-22     |
| FGF10        | 20 | 2.2 | 4.31   | 0.000035    |
| FKBP5        | 23 | 2.2 | 11.38  | 1.96E-25    |
| FOSL1        | 29 | 2.2 | 9.17   | 1.87E-20    |
| GINS2        | 18 | 2.2 | 5.23   | 9.22E-13    |
| GPX3         | 7  | 2.2 | 9.08   | 8.89E-12    |
| GTSE1        | 5  | 2.2 | 12.81  | 4.31E-29    |
| IL36A        | 11 | 2.2 | 1.32   | 0.0000291   |
| KCNE4        | 2  | 2.2 | 25.54  | 2.69E-10    |
| KIF22        | 25 | 2.2 | 17.83  | 2.87E-29    |
| KLK10        | 18 | 2.2 | 1.35   | 0.0263      |
| LIMCH1       | 6  | 2.2 | 3.22   | 0.00459     |
| LOC100337435 | 21 | 2.2 | 6.41   | 2.1E-14     |
| LOC510844    | 18 | 2.2 | 7.5    | 2.07E-11    |
| LOC539953    | 16 | 2.2 | 6.26   | 5.19E-14    |
| LRRC34       | 1  | 2.2 | 3.54   | 1.23E-08    |
| MCM7         | 25 | 2.2 | 40.3   | 7.49E-34    |
| MELK         | 8  | 2.2 | 9.6    | 1.8E-23     |
| METTTL20     | 5  | 2.2 | 4.16   | 0.00000191  |
| MFSD7        | 6  | 2.2 | 9.05   | 2.53E-19    |
| PARVB        | 5  | 2.2 | 10.61  | 1.01E-21    |
| PHF19        | 8  | 2.2 | 16.51  | 5.23E-27    |
| PTGER4       | 20 | 2.2 | 5.32   | 1E-11       |
| RBPMS2       | 10 | 2.2 | 1.14   | 0.00012     |
| SFRP2        | 17 | 2.2 | 492.72 | 0.00494     |
| SKA1         | 24 | 2.2 | 5.61   | 1.48E-13    |
| SKA3         | 12 | 2.2 | 10.39  | 5.23E-25    |
| ABCC9        | 5  | 2.1 | 1.62   | 0.0000609   |
| ACER2        | 8  | 2.1 | 1.52   | 0.000106    |
| ACOX2        | 22 | 2.1 | 10.85  | 9.24E-11    |
| AHR          | 4  | 2.1 | 5.48   | 0.000000017 |
| BRCA2        | 12 | 2.1 | 6.3    | 8.65E-13    |
| C19H17orf53  | 19 | 2.1 | 1.23   | 0.000404    |

|              |    |     |        |             |
|--------------|----|-----|--------|-------------|
| C1QTNF7      | 6  | 2.1 | 2.05   | 0.0496      |
| C24H18orf54  | 24 | 2.1 | 2.18   | 0.00000475  |
| C6H4orf21    | 6  | 2.1 | 5.05   | 0.000205    |
| CARD6        | 20 | 2.1 | 2.92   | 0.00000124  |
| CENPK        | 20 | 2.1 | 3.91   | 0.000000256 |
| DIAPH3       | 12 | 2.1 | 41.2   | 4.89E-30    |
| FAM83H       | 14 | 2.1 | 9.18   | 1.46E-09    |
| FEN1         | 29 | 2.1 | 5.6    | 7.12E-12    |
| GEN1         | 11 | 2.1 | 3.76   | 2.46E-08    |
| HMMR         | 7  | 2.1 | 27.11  | 3.51E-27    |
| ITGBL1       | 12 | 2.1 | 12.35  | 0.0000674   |
| KIF18A       | 15 | 2.1 | 3.57   | 2.45E-08    |
| KIF4A        | X  | 2.1 | 16.82  | 6.25E-25    |
| LOC100138767 | 18 | 2.1 | 2.18   | 0.0000172   |
| LOC100301478 | X  | 2.1 | 4.4    | 8.49E-09    |
| LOC100848256 | 7  | 2.1 | 2.73   | 0.00000252  |
| LOC506831    | 14 | 2.1 | 8      | 7.79E-14    |
| MAD2         | 6  | 2.1 | 5.87   | 3.54E-12    |
| MCM10        | 13 | 2.1 | 16.84  | 2.51E-23    |
| MIS18BP1     | 21 | 2.1 | 11.62  | 6.51E-23    |
| MYOC         | 16 | 2.1 | 6.29   | 4.88E-10    |
| OGN          | 8  | 2.1 | 197.96 | 2.44E-11    |
| PCNA         | 13 | 2.1 | 31.24  | 1.42E-25    |
| PIK3R1       | 20 | 2.1 | 58.55  | 1.94E-25    |
| PKD2L1       | 26 | 2.1 | 3.77   | 7.89E-08    |
| PKIA         | 14 | 2.1 | 2.83   | 0.000953    |
| POLA2        | 29 | 2.1 | 5.3    | 4.17E-10    |
| REEP1        | 11 | 2.1 | 2.02   | 0.0107      |
| REEP6        | 7  | 2.1 | 1.15   | 0.000464    |
| TLR4         | 8  | 2.1 | 1.69   | 0.0046      |
| TPD52        | 14 | 2.1 | 10.79  | 2.21E-15    |
| TPX2         | 13 | 2.1 | 49.06  | 4.49E-32    |
| TRAIP        | 22 | 2.1 | 1.43   | 0.000355    |
| ABTB2        | 15 | 2   | 3.57   | 0.000000126 |
| BRCA1        | 19 | 2   | 10.23  | 2.61E-20    |
| CEP72        | 20 | 2   | 2.97   | 0.00000439  |
| FADS1        | 29 | 2   | 16.48  | 1.89E-11    |
| GJC1         | 19 | 2   | 1.25   | 0.000538    |
| HMGB2        | 8  | 2   | 16.72  | 6.16E-23    |
| HPGD         | 8  | 2   | 27.91  | 7.61E-19    |
| LOC100847448 | 20 | 2   | 95.3   | 4.34E-24    |
| LOC618297    | 4  | 2   | 13.91  | 1.34E-25    |
| PAK6         | 10 | 2   | 2.38   | 0.00000892  |
| PCDHB4       | 7  | 2   | 1.09   | 0.0182      |
| POLQ         | 1  | 2   | 4.77   | 1.36E-09    |



|              |    |      |       |             |
|--------------|----|------|-------|-------------|
| SPRY4        | 7  | 2    | 1.94  | 0.000364    |
| TRPC4        | 12 | 2    | 7.33  | 7E-12       |
| WHSC1        | 6  | 2    | 25.5  | 1.03E-25    |
| ASPA         | 19 | -2   | 2.95  | 0.0000921   |
| ATP8B1       | 24 | -2   | 15.42 | 4.7E-16     |
| CACNA1H      | 25 | -2   | 24.18 | 0.00000121  |
| COPG2        | 4  | -2   | 33.37 | 2.75E-21    |
| CPXM2        | 26 | -2   | 1.26  | 0.00279     |
| CRABP2       | 3  | -2   | 69.14 | 1.6E-09     |
| DUSP10       | 16 | -2   | 4.61  | 0.000000311 |
| KIAA0408     | 9  | -2   | 10.95 | 3.56E-18    |
| LOC100296463 | 25 | -2   | 29.51 | 1.1E-19     |
| LOC100335396 | 3  | -2   | 2.62  | 0.00106     |
| NPR3         | 20 | -2   | 26.34 | 3.04E-19    |
| PIK3CD       | 16 | -2   | 1.58  | 0.000176    |
| TBXA2R       | 7  | -2   | 9.24  | 7.47E-16    |
| TMEM132D     | 17 | -2   | 27.17 | 7.29E-28    |
| ADAMTS14     | 28 | -2.1 | 3.04  | 0.00000077  |
| AMY2B        | 3  | -2.1 | 4.31  | 2.97E-08    |
| DRAM1        | 5  | -2.1 | 9.1   | 1.68E-14    |
| GLIS1        | 3  | -2.1 | 1.55  | 0.0373      |
| GPR63        | 9  | -2.1 | 7.68  | 4.53E-13    |
| ITGA9        | 22 | -2.1 | 4.91  | 7.97E-09    |
| JAKMIP2      | 7  | -2.1 | 1.39  | 0.00392     |
| KLHL13       | X  | -2.1 | 5.05  | 8.22E-09    |
| LMO4         | 3  | -2.1 | 29.45 | 6.52E-08    |
| LOC100295656 | 19 | -2.1 | 1.63  | 0.000162    |
| LOC516576    | 16 | -2.1 | 3.91  | 0.000248    |
| LOC786974    | 20 | -2.1 | 16.44 | 0.00406     |
| LRIG3        | 5  | -2.1 | 45.54 | 4.3E-31     |
| MDK          | 15 | -2.1 | 2.46  | 0.00000256  |
| RNF150       | 17 | -2.1 | 10.1  | 2.37E-20    |
| RPL7A        | 11 | -2.1 | 455.5 | 0.00397     |
| CCDC158      | 6  | -2.2 | 1     | 0.00049     |
| IL1RAP       | 1  | -2.2 | 2.29  | 0.000000309 |
| ITGA6        | 2  | -2.2 | 9.4   | 6.78E-20    |
| KCTD12       | 12 | -2.2 | 6.64  | 1.35E-10    |
| LOC100140687 | 8  | -2.2 | 1.74  | 0.00000444  |
| LOC786977    | 3  | -2.2 | 4.56  | 0.0000271   |
| MARCKS       | 9  | -2.2 | 17.86 | 4.59E-17    |
| MGC148692    | 6  | -2.2 | 2.2   | 0.0000485   |
| PCSK5        | 8  | -2.2 | 27.04 | 1.81E-14    |
| PIK3AP1      | 26 | -2.2 | 5.5   | 2.61E-12    |
| PTGFR        | 3  | -2.2 | 4.78  | 6.11E-08    |
| SCN3A        | 2  | -2.2 | 4.06  | 0.00215     |

|            |    |      |        |            |
|------------|----|------|--------|------------|
| SOBP       | 9  | -2.2 | 1.9    | 0.00000616 |
| VWA5A      | 29 | -2.2 | 5.42   | 0.0000513  |
| WNT11      | 15 | -2.2 | 1.49   | 0.00627    |
| WNT9A      | 7  | -2.2 | 1.04   | 0.0128     |
| AQP1       | 4  | -2.3 | 287.42 | 2.37E-12   |
| CA11       | 18 | -2.3 | 1.58   | 0.0000023  |
| ELOVL7     | 20 | -2.3 | 41.05  | 1.01E-29   |
| FNBP1L     | 3  | -2.3 | 5.7    | 2.15E-12   |
| FOS        | 10 | -2.3 | 17.17  | 4.4E-29    |
| FZD1       | 4  | -2.3 | 98.66  | 1.27E-35   |
| GLRB       | 17 | -2.3 | 6.85   | 0.000183   |
| LOC511531  | 3  | -2.3 | 1.19   | 0.0239     |
| MYO3B      | 2  | -2.3 | 1.57   | 0.000337   |
| PALM3      | 7  | -2.3 | 2.02   | 0.000341   |
| SLC2A3     | 5  | -2.3 | 35.18  | 2.31E-29   |
| SLC7A8     | 10 | -2.3 | 1.82   | 0.00000033 |
| SPHK1      | 19 | -2.3 | 16.87  | 0.00000206 |
| STK31      | 4  | -2.3 | 1.26   | 0.000332   |
| WNT2       | 4  | -2.3 | 8.22   | 4.4E-17    |
| C9H6orf174 | 9  | -2.4 | 4.21   | 8.38E-12   |
| CILP2      | 7  | -2.4 | 1.44   | 0.00000886 |
| CYP7B1     | 14 | -2.4 | 1.02   | 0.000177   |
| FABP3      | 2  | -2.4 | 37.11  | 2.48E-11   |
| GDA        | 8  | -2.4 | 1.52   | 0.0000031  |
| GNG7       | 7  | -2.4 | 7.17   | 3E-19      |
| HBEGF      | 7  | -2.4 | 1.04   | 0.0000353  |
| IGFBP5     | 2  | -2.4 | 43.9   | 9.79E-12   |
| KCNJ5      | 29 | -2.4 | 5.9    | 0.0347     |
| PDLIM2     | 8  | -2.4 | 90.16  | 5.14E-33   |
| RASL11B    | 6  | -2.4 | 4.36   | 1.86E-12   |
| SMARCA1    | X  | -2.4 | 82.61  | 9.99E-49   |
| COL8A2     | 3  | -2.5 | 7.83   | 4.07E-16   |
| DPYSL3     | 7  | -2.5 | 368.12 | 1.78E-30   |
| FAM149A    | 27 | -2.5 | 2.06   | 0.00187    |
| GRAMD1B    | 15 | -2.5 | 1.17   | 0.000483   |
| JAM2       | 1  | -2.5 | 3.45   | 3.11E-10   |
| NOG        | 19 | -2.5 | 2.71   | 3.8E-10    |
| RSPH10B    | 25 | -2.5 | 1.05   | 0.0122     |
| SRL        | 25 | -2.5 | 4.24   | 1.87E-13   |
| TBX21      | 19 | -2.5 | 1.09   | 0.000165   |
| TRAF5      | 16 | -2.5 | 9.26   | 1.15E-28   |
| ACTG2      | 11 | -2.6 | 198.34 | 1.11E-35   |
| ADRB2      | 7  | -2.6 | 2.53   | 8.31E-09   |
| C10H5orf13 | 10 | -2.6 | 60.87  | 1.02E-26   |
| CDH6       | 20 | -2.6 | 1.06   | 0.0335     |

|              |    |      |        |             |
|--------------|----|------|--------|-------------|
| FHOD3        | 24 | -2.6 | 3.96   | 2.6E-09     |
| HTR2A        | 12 | -2.6 | 1.9    | 0.000000379 |
| LOC100847777 | 9  | -2.6 | 1.6    | 0.000000209 |
| LOC100848636 | 5  | -2.6 | 2.18   | 0.00158     |
| MAP1LC3C     | 16 | -2.6 | 3.38   | 1.86E-12    |
| PLCXD2       | 1  | -2.6 | 1.76   | 9.82E-09    |
| SH3GL3       | 21 | -2.6 | 1.02   | 0.000523    |
| TMTC2        | 5  | -2.6 | 45.61  | 5.64E-51    |
| B3GALNT1     | 1  | -2.7 | 2.38   | 9.2E-11     |
| CDO1         | 10 | -2.7 | 3.21   | 1.29E-08    |
| HS2ST1       | 3  | -2.7 | 2.38   | 0.00011     |
| LOC512486    | 3  | -2.7 | 3.67   | 0.000209    |
| NBEA         | 12 | -2.7 | 3.95   | 8.93E-14    |
| SEMA3E       | 4  | -2.7 | 6.57   | 9.91E-24    |
| FAT3         | 29 | -2.8 | 2.28   | 6.87E-10    |
| LOC100336258 | 17 | -2.8 | 2.68   | 0.0000606   |
| MREG         | 2  | -2.8 | 6.74   | 7.19E-20    |
| NEURL1B      | 20 | -2.8 | 1.79   | 0.00000816  |
| NTN1         | 19 | -2.8 | 14.32  | 3E-17       |
| P4HA3        | 15 | -2.8 | 17.67  | 2.8E-39     |
| PNPLA1       | 23 | -2.8 | 1.59   | 0.000000645 |
| TRPV2        | 19 | -2.8 | 1.56   | 3.92E-09    |
| CHN1         | 2  | -2.9 | 61.5   | 4.98E-49    |
| DLL1         | 9  | -2.9 | 1.24   | 1.39E-08    |
| IGDCC4       | 10 | -2.9 | 2.45   | 1.79E-10    |
| LOC100848933 | 20 | -2.9 | 2.11   | 1.17E-08    |
| RGS17        | 9  | -2.9 | 9.69   | 5.16E-22    |
| FAM171B      | 2  | -3   | 6.43   | 3.96E-21    |
| LOC100138964 | 20 | -3   | 1.19   | 1.53E-08    |
| LRP1B        | 2  | -3   | 12.8   | 0.0239      |
| RSPO2        | 14 | -3   | 2.13   | 2.84E-08    |
| GABRE        | X  | -3.1 | 3.17   | 1.96E-12    |
| LMTK3        | 18 | -3.1 | 3.16   | 1.51E-14    |
| LOC100847497 | X  | -3.1 | 1.3    | 1.17E-09    |
| MATN3        | 11 | -3.1 | 22.56  | 5.17E-40    |
| TNFSF4       | 16 | -3.1 | 1.51   | 0.000000177 |
| EDNRA        | 17 | -3.2 | 8.17   | 3.24E-20    |
| INHBA        | 4  | -3.2 | 25.97  | 5.65E-50    |
| SORBS2       | 27 | -3.2 | 2.09   | 4.92E-08    |
| GNAI1        | 4  | -3.3 | 6.26   | 0.000000454 |
| LOC787103    | 9  | -3.3 | 6.17   | 6.97E-26    |
| SRPX2        | X  | -3.3 | 9.54   | 7.88E-35    |
| GLUL         | 16 | -3.4 | 206.15 | 5.52E-60    |
| GZMA         | 20 | -3.4 | 1.33   | 2.01E-08    |
| LGI2         | 6  | -3.4 | 1.99   | 0.0000649   |

|              |    |      |        |             |
|--------------|----|------|--------|-------------|
| NKX2-2       | 13 | -3.4 | 2.65   | 1.09E-16    |
| STAC2        | 19 | -3.4 | 1.4    | 9.35E-10    |
| ABCA1        | 8  | -3.5 | 3.47   | 0.00000113  |
| ACTC1        | 10 | -3.5 | 3.36   | 1.27E-17    |
| GLULP        | 2  | -3.5 | 12.45  | 7.08E-55    |
| C19H17orf61  | 19 | -3.6 | 12.14  | 7E-69       |
| IGF2BP3      | 4  | -3.6 | 9.25   | 2.36E-47    |
| LOC100299139 | 24 | -3.7 | 8.96   | 2.69E-52    |
| THBD         | 13 | -3.7 | 7.31   | 1.42E-39    |
| WNT2B        | 3  | -3.7 | 1.34   | 0.000000181 |
| ARHGEF26     | 1  | -3.8 | 2.61   | 7.5E-20     |
| GDAP1L1      | 13 | -4   | 2.72   | 6.04E-11    |
| MUM1L1       | X  | -4   | 1.35   | 1.14E-10    |
| DPT          | 16 | -4.1 | 12.2   | 3.49E-62    |
| ITGA8        | 13 | -4.1 | 10.27  | 4.7E-40     |
| TARSL2       | 21 | -4.1 | 1.17   | 5.83E-11    |
| COLEC12      | 24 | -4.3 | 1.52   | 0.000000492 |
| FEZ1         | 29 | -4.3 | 2.11   | 1.58E-12    |
| IGF2BP2      | 1  | -4.3 | 6.92   | 5.59E-30    |
| LOC522631    | 24 | -4.3 | 1.39   | 3.89E-15    |
| MEGF6        | 16 | -4.4 | 14.5   | 9.74E-43    |
| LOC100848103 | 25 | -4.5 | 6.2    | 1.1E-26     |
| RIMS1        | 9  | -4.5 | 1.16   | 0.00669     |
| TMEM40       | 22 | -4.5 | 2.77   | 6.4E-25     |
| TRPS1        | 14 | -4.5 | 3.03   | 1.52E-16    |
| LOC100848949 | 1  | -4.6 | 4.49   | 6.01E-26    |
| MAP2K6       | 19 | -4.6 | 3.74   | 1.33E-13    |
| HPCAL4       | 3  | -4.7 | 2.02   | 0.000000036 |
| PTHLH        | 5  | -4.8 | 3.22   | 2.6E-11     |
| F2R          | 10 | -5.1 | 1.28   | 1.28E-17    |
| LOC517509    | 10 | -5.2 | 4.35   | 9.73E-13    |
| LTBP1        | 11 | -5.2 | 92.68  | 2.66E-119   |
| SPOCK1       | 7  | -5.2 | 6.42   | 4.61E-21    |
| MEST         | 4  | -5.3 | 10.86  | 6.07E-75    |
| SEMA3D       | 4  | -5.3 | 39.26  | 5.59E-49    |
| ATP6AP1L     | 7  | -5.4 | 8.7    | 1.88E-45    |
| SRSF12       | 9  | -5.5 | 1.26   | 3.04E-15    |
| LOC100847414 | 4  | -5.6 | 30.31  | 1.43E-32    |
| PGM5         | 8  | -5.7 | 6.4    | 7.2E-63     |
| CTNNA2       | 11 | -6   | 6.94   | 6.06E-63    |
| COL2A1       | 5  | -6.1 | 1.79   | 0.0382      |
| DFNA5        | 4  | -6.2 | 1.05   | 3.08E-17    |
| POSTN        | 12 | -6.7 | 149.69 | 2.86E-23    |
| BRSK1        | 18 | -7.2 | 1.41   | 3.71E-25    |
| RUNX3        | 2  | -7.8 | 1.16   | 6.91E-13    |

|              |   |       |      |          |
|--------------|---|-------|------|----------|
| LOC100848767 | 4 | -13.7 | 3.93 | 4.74E-60 |
| LOC784924    | 4 | -14.4 | 1.98 | 1.91E-30 |
| EYA4         | 9 | -18.1 | 8.63 | 1.13E-83 |
| CD200R1L     | 1 | -20.8 | 6.47 | 2.42E-20 |

## Hour 2

| Gene         | Chromosome | Fold Change | CPM   | FDR         |
|--------------|------------|-------------|-------|-------------|
| PTX3         | 1          | 67.7        | 5.27  | 9.1E-18     |
| ACAN         | 21         | 45.8        | 12.59 | 1.07E-12    |
| NTS          | 5          | 34.6        | 3.29  | 1.07E-12    |
| DTX4         | 15         | 32.2        | 3.06  | 1.94E-12    |
| GREB1        | 11         | 31.1        | 1.76  | 0.00000202  |
| CCL20        | 2          | 18.1        | 2.15  | 0.00000486  |
| TBX2         | 19         | 17          | 2.28  | 5.37E-08    |
| C2CD4B       | 10         | 15.4        | 2.66  | 0.000000119 |
| RND1         | 5          | 14.4        | 71.34 | 1.17E-10    |
| MAN1C1       | 2          | 13.5        | 1.88  | 0.00000784  |
| LOC532218    | 5          | 13          | 38.61 | 6.69E-09    |
| SLCO4A1      | 13         | 13          | 2.36  | 0.000000171 |
| S1PR1        | 3          | 12.6        | 1     | 0.00000109  |
| ARHGDIB      | 5          | 12.2        | 1.23  | 0.0000139   |
| LOC100847493 | 20         | 11.9        | 1.61  | 0.000000294 |
| CX3CL1       | 18         | 11.6        | 3.6   | 9.47E-08    |
| COL8A1       | 1          | 11.1        | 7.88  | 0.00000828  |
| FGD5         | 22         | 10.9        | 5.12  | 0.000000185 |
| CCL5         | 19         | 10.7        | 55.58 | 0.0000229   |
| IL6          | 4          | 10.5        | 20.73 | 1.85E-08    |
| CLDN11       | 1          | 10.4        | 1.6   | 0.00000683  |
| TNF          | 23         | 10.4        | 4.15  | 0.000000346 |
| CFB          | 23         | 10.2        | 12.64 | 0.000000292 |
| IFI27        | 21         | 10.2        | 1.25  | 0.0000164   |
| PTGIS        | 13         | 9.6         | 35.82 | 0.000000105 |
| LOC100847495 | 23         | 9.4         | 4.99  | 0.00000151  |
| MGLL         | 22         | 9.2         | 23.76 | 7.91E-08    |
| RARRES1      | 1          | 9.2         | 57.63 | 0.000000283 |
| LOC509420    | 8          | 8.7         | 1.01  | 0.0000451   |
| FES          | 21         | 8.4         | 9.16  | 0.00000135  |
| MASP1        | 1          | 8.1         | 10.15 | 0.0000242   |
| CA13         | 14         | 7.7         | 3.56  | 0.000486    |
| CD83         | 23         | 7.7         | 7.12  | 0.00000307  |
| KCNMB1       | 20         | 7.6         | 2.29  | 0.0332      |
| LOC100847896 | 15         | 7.6         | 1.47  | 0.00018     |
| LOC516579    | 13         | 7.5         | 1.97  | 0.000127    |
| MT2A         | 18         | 7.5         | 24.32 | 0.00995     |
| TNN          | 16         | 7.5         | 2.52  | 0.0043      |

|              |    |     |        |            |
|--------------|----|-----|--------|------------|
| CCL2         | 19 | 7.3 | 296.65 | 0.00000245 |
| BCAS1        | 13 | 7.2 | 2.91   | 0.0000336  |
| MN1          | 17 | 7.2 | 2.26   | 0.00529    |
| LOC618369    | 5  | 7.1 | 13.15  | 0.00000471 |
| CACNA1C      | 5  | 6.9 | 2.44   | 0.000154   |
| KLK10        | 18 | 6.9 | 3.34   | 0.0000811  |
| LOC789200    | 29 | 6.9 | 3.06   | 0.011      |
| MOCOS        | 24 | 6.6 | 2.84   | 0.00274    |
| CDA          | 2  | 6.5 | 2.34   | 0.000167   |
| LSP1         | 29 | 6.5 | 10.88  | 0.000261   |
| SESN3        | 15 | 6.5 | 11.72  | 0.0282     |
| TFAP2A       | 23 | 6.5 | 3.08   | 0.000196   |
| AFAP1L2      | 26 | 6.4 | 9.4    | 0.000218   |
| LOC100847561 | 23 | 6.2 | 1.2    | 0.000516   |
| ELMO3        | 18 | 6   | 1.19   | 0.00266    |
| GPR132       | 21 | 5.8 | 5.38   | 0.000461   |
| IL8          | 6  | 5.8 | 33.63  | 0.000135   |
| SDK2         | 19 | 5.8 | 1.89   | 0.000974   |
| TSTD1        | 3  | 5.7 | 5      | 0.00198    |
| SEMA5A       | 20 | 5.6 | 5.32   | 0.000768   |
| LOC616198    | 9  | 5.5 | 1.85   | 0.00104    |
| PTGS2        | 16 | 5.5 | 118.09 | 0.00353    |
| TCF19        | 23 | 5.5 | 3.53   | 0.00551    |
| CRTAC1       | 26 | 5.4 | 1.99   | 0.00327    |
| CCL26        | 25 | 5.3 | 4.97   | 0.00199    |
| FADS2        | 29 | 5.3 | 3.4    | 0.00507    |
| HCN4         | 10 | 5.2 | 2.52   | 0.00264    |
| LOC100138376 | 16 | 5.2 | 71.18  | 0.00893    |
| RPS6KA1      | 2  | 5.2 | 1.35   | 0.00497    |
| TOX          | 14 | 5.2 | 3.46   | 0.0297     |
| HSD17B14     | 18 | 5.1 | 3.57   | 0.0307     |
| SMOC2        | 9  | 5.1 | 43.11  | 0.00361    |
| BDKRB1       | 21 | 5   | 3.13   | 0.00507    |
| CPZ          | 6  | 5   | 4.19   | 0.00243    |
| ELN          | 25 | 5   | 387.35 | 0.00171    |
| IER3         | 23 | 5   | 469.59 | 0.00292    |
| CXCL2        | 6  | 4.9 | 177.21 | 0.000222   |
| N4BP3        | 7  | 4.9 | 11.61  | 0.00276    |
| RAD54L       | 3  | 4.9 | 4.15   | 0.00651    |
| TRIM47       | 19 | 4.8 | 16.54  | 0.00559    |
| EGLN3        | 21 | 4.7 | 8.78   | 0.00112    |
| CDT1         | 18 | 4.6 | 2.82   | 0.0245     |
| GALNT14      | 11 | 4.6 | 1.06   | 0.0319     |
| HAS2         | 14 | 4.6 | 6.84   | 0.0413     |
| HHIPL1       | 21 | 4.6 | 8.41   | 0.00737    |

|              |    |      |        |         |
|--------------|----|------|--------|---------|
| C28H10orf10  | 28 | 4.5  | 2.02   | 0.0223  |
| MCM5         | 5  | 4.5  | 21.4   | 0.00538 |
| TNIP1        | 7  | 4.5  | 152.86 | 0.00274 |
| CRYAB        | 15 | 4.4  | 56.95  | 0.0092  |
| CDCA3        | 5  | 4.3  | 14.97  | 0.0183  |
| LOC100337435 | 21 | 4.3  | 43.14  | 0.0118  |
| NFKBID       | 18 | 4.3  | 9.72   | 0.00422 |
| CDC20        | 3  | 4.2  | 23.55  | 0.0118  |
| GSTO2        | 26 | 4.2  | 1.12   | 0.0173  |
| PDE4B        | 3  | 4.2  | 7.84   | 0.00476 |
| PERP         | 9  | 4.2  | 5.02   | 0.011   |
| CARD11       | 25 | 4.1  | 3.31   | 0.021   |
| CD40         | 13 | 4    | 12.33  | 0.0053  |
| CDCA5        | 29 | 4    | 2.6    | 0.0232  |
| CYP1A1       | 21 | 4    | 5.87   | 0.0133  |
| GPX3         | 7  | 4    | 15.69  | 0.00384 |
| NAPRT1       | 14 | 4    | 8.92   | 0.0359  |
| NFATC1       | 24 | 4    | 126.68 | 0.00436 |
| TLR2         | 17 | 4    | 1      | 0.0341  |
| CD34         | 16 | 3.9  | 3.71   | 0.0228  |
| IL1RL1       | 11 | 3.9  | 18.65  | 0.00991 |
| NKD2         | 20 | 3.9  | 3.53   | 0.0356  |
| LOC100848911 | 7  | 3.8  | 12.12  | 0.0308  |
| LOC790886    | 16 | 3.8  | 6.66   | 0.0156  |
| C15H11orf96  | 15 | 3.7  | 114.03 | 0.0109  |
| MAP3K8       | 13 | 3.7  | 11.68  | 0.019   |
| TROAP        | 5  | 3.7  | 6.22   | 0.0166  |
| MCM4         | 14 | 3.6  | 11.81  | 0.0297  |
| UBE2C        | 13 | 3.5  | 21.49  | 0.0223  |
| RRM2         | 11 | 3.4  | 32.4   | 0.0242  |
| STMN1        | 2  | 3.3  | 37.87  | 0.0243  |
| UHRF1        | 7  | 3.3  | 10.91  | 0.032   |
| MCM3         | 23 | 3.2  | 14.49  | 0.0459  |
| LOC100848038 | 7  | 3.1  | 228.65 | 0.0287  |
| RCAN1        | 1  | 3    | 72.58  | 0.0459  |
| CDKN2B       | 8  | -3.4 | 33.76  | 0.0352  |
| CHN1         | 2  | -3.6 | 51.68  | 0.0232  |
| LRIG3        | 5  | -3.6 | 10.05  | 0.0458  |
| STAC2        | 19 | -3.9 | 1.43   | 0.0386  |
| MAP2K6       | 19 | -4.3 | 3.34   | 0.00624 |
| FAT3         | 29 | -4.4 | 1.69   | 0.0142  |
| SRSF12       | 9  | -4.4 | 1.01   | 0.0234  |
| IGF2BP2      | 1  | -4.5 | 6.05   | 0.00624 |
| COL8A2       | 3  | -4.6 | 7.99   | 0.0491  |
| GNAI1        | 4  | -4.6 | 5.34   | 0.0447  |

|              |    |       |        |            |
|--------------|----|-------|--------|------------|
| THBD         | 13 | -4.6  | 9.98   | 0.00127    |
| ADRB2        | 7  | -4.7  | 1.33   | 0.0254     |
| ATP6AP1L     | 7  | -4.7  | 9.33   | 0.00289    |
| KCNJ5        | 29 | -4.9  | 4.72   | 0.00476    |
| IGF2BP3      | 4  | -5    | 6.92   | 0.0024     |
| MATN3        | 11 | -5    | 18.88  | 0.038      |
| PGM5         | 8  | -5.2  | 5.56   | 0.000612   |
| ITGA8        | 13 | -5.5  | 8.9    | 0.00134    |
| TRPS1        | 14 | -6    | 2.4    | 0.00101    |
| SPOCK1       | 7  | -6.2  | 5.77   | 0.00139    |
| CTNNA2       | 11 | -6.4  | 6.44   | 0.0000752  |
| MEGF6        | 16 | -6.5  | 12.58  | 0.0000218  |
| MEST         | 4  | -6.5  | 9.13   | 0.0000881  |
| ARHGEF26     | 1  | -6.6  | 1.81   | 0.000974   |
| LTBP1        | 11 | -7    | 81.68  | 0.0000981  |
| RUNX3        | 2  | -7.2  | 1      | 0.000946   |
| MREG         | 2  | -7.5  | 5.24   | 0.0198     |
| LOC100847414 | 4  | -7.9  | 26.32  | 0.000222   |
| SEMA3D       | 4  | -9.5  | 34.57  | 0.00127    |
| POSTN        | 12 | -9.6  | 130.43 | 0.0000298  |
| MUM1L1       | X  | -9.8  | 1.21   | 0.0352     |
| LOC100848767 | 4  | -11.5 | 3.01   | 0.00000151 |
| LOC784924    | 4  | -11.7 | 1.7    | 0.00000023 |
| BRSK1        | 18 | -18   | 1.2    | 0.00000246 |
| CD200R1L     | 1  | -23.6 | 5.24   | 0.00000216 |
| EYA4         | 9  | -28.1 | 8.85   | 1.94E-09   |

### Hour 8

| Gene      | Chromosome | Fold Change | CPM  | FDR      |
|-----------|------------|-------------|------|----------|
| NPY1R     | 6          | 94.5        | 0.82 | 3.45E-66 |
| TMEM100   | 19         | 59.2        | 0.8  | 3.41E-57 |
| GREB1     | 11         | 48.7        | 1.18 | 1.19E-72 |
| MX2       | 1          | 33.9        | 1.04 | 8.52E-46 |
| MMP3      | 15         | 27.8        | 0.16 | 3.46E-39 |
| NTS       | 5          | 27.7        | 2.21 | 6.57E-91 |
| DTX4      | 15         | 20.7        | 1.25 | 1.45E-33 |
| TGM3      | 13         | 20.4        | 3.77 | 4.31E-58 |
| ACAN      | 21         | 19          | 4.06 | 5.42E-64 |
| MAN1C1    | 2          | 18.8        | 2.06 | 9.89E-28 |
| OAS1      | 17         | 12.8        | 5.1  | 1.08E-28 |
| COL8A1    | 1          | 10.9        | 2.87 | 1.41E-51 |
| OAS2      | 17         | 10.6        | 2.23 | 2.05E-28 |
| LOC516579 | 13         | 10.3        | 0.43 | 3.91E-16 |
| CCL20     | 2          | 10.1        | 0.48 | 6.52E-21 |
| S1PR1     | 3          | 9.8         | 0.04 | 3.48E-23 |



|              |    |     |      |             |
|--------------|----|-----|------|-------------|
| MASP1        | 1  | 9.3 | 3.78 | 1.14E-19    |
| MAOA         | X  | 9.2 | 0.69 | 1.04E-15    |
| BCAS1        | 13 | 8.6 | 1.95 | 6.99E-36    |
| MN1          | 17 | 8.5 | 0.85 | 4.43E-30    |
| HRH1         | 22 | 8.4 | 0.21 | 2.19E-19    |
| FGD5         | 22 | 8.2 | 1.6  | 3.41E-38    |
| IL6          | 4  | 7.9 | 5.23 | 1.36E-34    |
| FES          | 21 | 7.7 | 3.44 | 1.59E-98    |
| LOC782202    | 3  | 7.7 | 1.94 | 0.00818     |
| RARRES1      | 1  | 7.6 | 5.62 | 1.99E-63    |
| LOC100847495 | 23 | 7.5 | 1.61 | 2.45E-35    |
| AFAP1L2      | 26 | 7.4 | 2.56 | 5.81E-60    |
| IFI27        | 21 | 7.3 | 1.99 | 8.32E-39    |
| SDK2         | 19 | 7.1 | 1.94 | 2.28E-39    |
| SESN3        | 15 | 7.1 | 2.62 | 6.21E-24    |
| CDC6         | 19 | 6.9 | 2.3  | 8E-16       |
| CLDN11       | 1  | 6.9 | 1.45 | 8.85E-29    |
| PDPN         | 16 | 6.8 | 1.09 | 0.0000586   |
| PAQR7        | 2  | 6.7 | 0.27 | 1.39E-22    |
| CA13         | 14 | 6.4 | 0.99 | 1.92E-10    |
| E2F8         | 29 | 6.4 | 1.61 | 1.16E-15    |
| SEMA5A       | 20 | 6.3 | 2.45 | 1.87E-48    |
| CACNA1C      | 5  | 6   | 1.32 | 2.65E-28    |
| BDKRB1       | 21 | 5.9 | 2.98 | 3.03E-32    |
| TFAP2A       | 23 | 5.9 | 2.9  | 8.56E-58    |
| TOX          | 14 | 5.9 | 1.55 | 2.2E-30     |
| TBX2         | 19 | 5.8 | 0.05 | 1.96E-17    |
| ITPR3        | 23 | 5.7 | 0.48 | 6.55E-15    |
| PTX3         | 1  | 5.7 | 2.32 | 5.05E-25    |
| DRD3         | 1  | 5.5 | 0.62 | 1.22E-20    |
| HAS2         | 14 | 5.5 | 2.86 | 4.58E-44    |
| CYP1A1       | 21 | 5.4 | 2.19 | 1.55E-25    |
| SAA3         | 29 | 5.1 | 1.53 | 8.65E-09    |
| SMOC2        | 9  | 5.1 | 5.34 | 6.66E-14    |
| KCNMB1       | 20 | 5   | 1.43 | 1.49E-22    |
| STRA6        | 21 | 5   | 0.92 | 2.82E-10    |
| TNN          | 16 | 5   | 1.47 | 8.24E-12    |
| CRTAC1       | 26 | 4.9 | 1.73 | 3.11E-10    |
| DACT2        | 9  | 4.9 | 2.04 | 2.19E-22    |
| PTGIS        | 13 | 4.9 | 4.97 | 1.02E-94    |
| FOXM1        | 5  | 4.7 | 1.09 | 5.71E-17    |
| LOC618369    | 5  | 4.7 | 2.92 | 7.17E-32    |
| GPR132       | 21 | 4.6 | 0.17 | 3.53E-15    |
| KLK10        | 18 | 4.6 | 1.64 | 0.000000342 |
| MGLL         | 22 | 4.5 | 3.81 | 4.78E-37    |

|              |    |     |      |             |
|--------------|----|-----|------|-------------|
| ISG15        | 16 | 4.4 | 2.38 | 0.000000344 |
| KITLG        | 5  | 4.4 | 1.84 | 3.54E-19    |
| LOC512286    | 3  | 4.4 | 0.03 | 1.77E-12    |
| HJURP        | 3  | 4.3 | 3.07 | 6.8E-41     |
| HSD17B14     | 18 | 4.3 | 0.8  | 5.96E-09    |
| MOCOS        | 24 | 4.3 | 2.4  | 2.64E-26    |
| EXO1         | 16 | 4.2 | 1.55 | 0.000000448 |
| MX1          | 1  | 4.2 | 4.82 | 2.67E-19    |
| OLFML1       | 15 | 4.2 | 1.64 | 0.0016      |
| CDA          | 2  | 4.1 | 1.3  | 1.72E-10    |
| CDC25B       | 13 | 4.1 | 4.22 | 6.31E-85    |
| FAM83D       | 13 | 4.1 | 1.74 | 1.2E-09     |
| LOC100299874 | 9  | 4.1 | 0.05 | 3.62E-12    |
| PDE4B        | 3  | 4.1 | 3.92 | 2.79E-43    |
| COL15A1      | 8  | 4   | 7.8  | 2.95E-34    |
| FADS2        | 29 | 4   | 1.53 | 2.48E-12    |
| LOC100297676 | 5  | 4   | 4.74 | 8.94E-74    |
| MXD3         | 7  | 4   | 0.08 | 3E-11       |
| EGLN3        | 21 | 3.9 | 3.3  | 1.03E-37    |
| RRM2         | 11 | 3.9 | 5.95 | 2.56E-43    |
| C2           | 23 | 3.8 | 1.17 | 0.00000121  |
| CAMK1G       | 16 | 3.8 | 0.19 | 0.00000929  |
| CDCA5        | 29 | 3.8 | 1.93 | 7.34E-15    |
| CPZ          | 6  | 3.8 | 1.81 | 8.95E-16    |
| ELN          | 25 | 3.8 | 8.41 | 1.53E-12    |
| NEK2         | 16 | 3.8 | 1.31 | 3.9E-18     |
| UBE2C        | 13 | 3.8 | 3.66 | 2.99E-46    |
| CDC20        | 3  | 3.7 | 3.91 | 1.92E-64    |
| CFB          | 23 | 3.7 | 6.4  | 1.17E-60    |
| CMPK2        | 11 | 3.7 | 1.44 | 3.83E-09    |
| FAM64A       | 19 | 3.7 | 3    | 2.78E-24    |
| GALNT14      | 11 | 3.7 | 0.51 | 1.86E-08    |
| IL1RL1       | 11 | 3.7 | 5.39 | 7.65E-25    |
| KIF18B       | 19 | 3.7 | 2.01 | 9.32E-20    |
| TOP2A        | 19 | 3.7 | 5.44 | 3.71E-59    |
| TROAP        | 5  | 3.7 | 2.7  | 1.21E-26    |
| CCNF         | 25 | 3.6 | 2.73 | 3.8E-22     |
| CD34         | 16 | 3.6 | 1.96 | 2.82E-11    |
| FMNL1        | 19 | 3.6 | 1.73 | 1.38E-08    |
| KCNMA1       | 28 | 3.6 | 2.43 | 8.25E-19    |
| KIF2C        | 3  | 3.6 | 3.48 | 5.36E-32    |
| MKI67        | 26 | 3.6 | 5.31 | 3.69E-69    |
| UHRF1        | 7  | 3.6 | 4.33 | 3.85E-45    |
| BDKRB2       | 21 | 3.5 | 2.29 | 3.18E-17    |
| FBXO5        | 9  | 3.5 | 1.1  | 1.73E-12    |

|              |    |     |      |             |
|--------------|----|-----|------|-------------|
| KIAA0101     | 10 | 3.5 | 2.7  | 1.21E-26    |
| MARVELD2     | 20 | 3.5 | 0.42 | 3.49E-11    |
| MXRA5        | X  | 3.5 | 3.96 | 9.77E-09    |
| NEIL3        | 27 | 3.5 | 0.95 | 5.03E-09    |
| SOX13        | 16 | 3.5 | 0.71 | 0.0000228   |
| SP100        | 2  | 3.5 | 1.09 | 0.000000803 |
| SPAG5        | 19 | 3.5 | 3.55 | 2.17E-36    |
| ASPM         | 16 | 3.4 | 4.13 | 6.1E-46     |
| CCL5         | 19 | 3.4 | 5.47 | 1.27E-25    |
| CLSPN        | 3  | 3.4 | 2.38 | 8.44E-19    |
| FAM49A       | 11 | 3.4 | 0.72 | 2.32E-10    |
| GFPT2        | 7  | 3.4 | 7.7  | 3.75E-39    |
| HEYL         | 3  | 3.4 | 1.29 | 8.84E-14    |
| LOC512293    | 4  | 3.4 | 1.12 | 1.84E-15    |
| LSP1         | 29 | 3.4 | 2.21 | 4.09E-16    |
| MT2A         | 18 | 3.4 | 3.84 | 7.33E-16    |
| PTGS1        | 11 | 3.4 | 5.75 | 9.81E-12    |
| ASF1B        | 7  | 3.3 | 2.2  | 9.77E-16    |
| BST2         | 7  | 3.3 | 4.67 | 1.12E-12    |
| CCNB1        | 20 | 3.3 | 4.14 | 1.14E-57    |
| CDCA3        | 5  | 3.3 | 2.57 | 8.01E-23    |
| CDT1         | 18 | 3.3 | 2.33 | 5.3E-13     |
| CENPA        | 11 | 3.3 | 3.1  | 7.49E-27    |
| IL8          | 6  | 3.3 | 6.02 | 8.28E-45    |
| KIF20A       | 7  | 3.3 | 4.73 | 1.24E-40    |
| NOD2         | 18 | 3.3 | 2.61 | 4.72E-18    |
| OLR1         | 5  | 3.3 | 4.95 | 1.9E-32     |
| PERP         | 9  | 3.3 | 2.61 | 2.34E-22    |
| RND1         | 5  | 3.3 | 3.53 | 8.35E-20    |
| TFAP4        | 25 | 3.3 | 0.48 | 0.00000387  |
| TSTD1        | 3  | 3.3 | 1.42 | 3.3E-14     |
| CCL2         | 19 | 3.2 | 7.88 | 3.78E-26    |
| CCNA2        | 6  | 3.2 | 3.75 | 5.34E-32    |
| ESPL1        | 5  | 3.2 | 3.74 | 2.2E-40     |
| KIF15        | 22 | 3.2 | 2.52 | 1.58E-22    |
| LOC100848911 | 7  | 3.2 | 2.86 | 6.35E-24    |
| ADAMTS16     | 20 | 3.1 | 0.65 | 2.3E-09     |
| CENPF        | 16 | 3.1 | 4.26 | 6.86E-46    |
| COL18A1      | 1  | 3.1 | 4.27 | 1.86E-52    |
| DEPDC1       | 3  | 3.1 | 2.34 | 9.68E-20    |
| ERCC6L       | X  | 3.1 | 1.68 | 3.49E-14    |
| IQGAP3       | 3  | 3.1 | 3.52 | 5.59E-30    |
| LOC100848019 | 9  | 3.1 | 5.78 | 2.44E-12    |
| LOC100848300 | 18 | 3.1 | 1.23 | 5.41E-08    |
| LOC790886    | 16 | 3.1 | 2.41 | 3.41E-15    |

|              |    |     |      |             |
|--------------|----|-----|------|-------------|
| PRR11        | 19 | 3.1 | 1.74 | 5.7E-15     |
| PRUNE2       | 8  | 3.1 | 4.34 | 9.42E-37    |
| SLC4A4       | 6  | 3.1 | 4.33 | 2.05E-48    |
| STMN1        | 2  | 3.1 | 4.52 | 7.99E-59    |
| C21H15orf42  | 21 | 3   | 2.21 | 1.32E-16    |
| CCL26        | 25 | 3   | 1.07 | 3.28E-08    |
| CDCA7        | 2  | 3   | 3.15 | 1.95E-16    |
| CFH          | 16 | 3   | 5.74 | 3.26E-36    |
| DAAM2        | 23 | 3   | 3.36 | 2.09E-13    |
| EFR3B        | 11 | 3   | 0.21 | 0.00509     |
| ESCO2        | 8  | 3   | 2.22 | 3.24E-18    |
| LMNB1        | 7  | 3   | 4.42 | 3.99E-41    |
| LOC790886    | 16 | 3   | 1.15 | 9.63E-12    |
| NUSAP1       | 10 | 3   | 2.88 | 9.94E-22    |
| PTGS2        | 16 | 3   | 5    | 3.15E-51    |
| PTPRB        | 5  | 3   | 0.65 | 4.97E-09    |
| SLC25A13     | 4  | 3   | 2.58 | 1.97E-21    |
| SLFN11       | 19 | 3   | 3.27 | 7.79E-11    |
| SOCS2        | 5  | 3   | 2.45 | 9.17E-19    |
| CCNB2        | 10 | 2.9 | 2.95 | 4.23E-22    |
| CORO2B       | 10 | 2.9 | 3.32 | 2.19E-23    |
| CX3CL1       | 18 | 2.9 | 0.26 | 0.0117      |
| CYP3A4       | 25 | 2.9 | 5.52 | 3.17E-13    |
| F13A1        | 23 | 2.9 | 9.02 | 7.93E-22    |
| HHIPL1       | 21 | 2.9 | 2.75 | 4.94E-22    |
| LOC100138376 | 16 | 2.9 | 4.3  | 1.89E-48    |
| LOC100298822 | 23 | 2.9 | 1.92 | 1.12E-09    |
| LOC100336368 | 4  | 2.9 | 1.55 | 2.42E-11    |
| LOC100847802 | 25 | 2.9 | 0.23 | 0.0000756   |
| LOC781004    | 16 | 2.9 | 1.96 | 4E-13       |
| NCAPH        | 11 | 2.9 | 2.49 | 7.75E-18    |
| SGOL1        | 1  | 2.9 | 1.83 | 3.48E-14    |
| SHCBP1       | 18 | 2.9 | 3.28 | 7.26E-21    |
| ABI3BP       | 1  | 2.8 | 7.8  | 0.00000329  |
| ARHGAP11A    | 10 | 2.8 | 2.79 | 7.91E-20    |
| CA4          | 19 | 2.8 | 1.66 | 0.00271     |
| CARD11       | 25 | 2.8 | 2.09 | 5.81E-12    |
| CASC5        | 10 | 2.8 | 3.95 | 9.46E-42    |
| CENPT        | 18 | 2.8 | 2.57 | 5.33E-17    |
| ITGA7        | 5  | 2.8 | 3.11 | 0.0000051   |
| KCNE4        | 2  | 2.8 | 4.86 | 2.22E-25    |
| KNTC1        | 17 | 2.8 | 3.38 | 2.19E-24    |
| LOC100336535 | 19 | 2.8 | 0.82 | 2.69E-08    |
| MCM5         | 5  | 2.8 | 4.75 | 2.07E-23    |
| MYB          | 9  | 2.8 | 0.39 | 0.000000349 |

|              |    |     |      |             |
|--------------|----|-----|------|-------------|
| MYBL1        | 14 | 2.8 | 1.86 | 1.02E-08    |
| MYBL2        | 13 | 2.8 | 4.47 | 5.83E-38    |
| NDC80        | 24 | 2.8 | 2.83 | 2.07E-22    |
| PAX2         | 26 | 2.8 | 1.17 | 4.08E-09    |
| PCOLCE2      | 1  | 2.8 | 1.86 | 0.000476    |
| PLK1         | 25 | 2.8 | 3.38 | 1.72E-26    |
| POLE         | 17 | 2.8 | 3.26 | 1.14E-18    |
| RAD51AP1     | 5  | 2.8 | 1.5  | 1.87E-09    |
| RAD54L       | 3  | 2.8 | 2.77 | 2.14E-18    |
| SOD2         | 9  | 2.8 | 3.74 | 1.26E-10    |
| TCF19        | 23 | 2.8 | 2.08 | 2.81E-13    |
| ZBP1         | 13 | 2.8 | 0.96 | 2.36E-08    |
| ABTB2        | 15 | 2.7 | 1.42 | 9.48E-10    |
| BUB1B        | 10 | 2.7 | 4.02 | 6.21E-37    |
| DHX58        | 19 | 2.7 | 2.44 | 6.75E-09    |
| DLGAP5       | 10 | 2.7 | 3.48 | 8.3E-25     |
| FAM105A      | 20 | 2.7 | 1.49 | 0.00000306  |
| GPX3         | 7  | 2.7 | 3.71 | 1.38E-21    |
| IL1RL2       | 11 | 2.7 | 0.49 | 0.00119     |
| KIF11        | 26 | 2.7 | 4.47 | 6.86E-46    |
| LOC100847721 | 9  | 2.7 | 2.05 | 1.53E-11    |
| LOC507055    | 3  | 2.7 | 0.53 | 0.00027     |
| LOC508486    | 25 | 2.7 | 0.51 | 0.000000126 |
| MAPK12       | 5  | 2.7 | 1.5  | 3.65E-08    |
| MB21D1       | 9  | 2.7 | 1.84 | 9.06E-10    |
| MCM3         | 23 | 2.7 | 4.94 | 1.02E-23    |
| OIP5         | 10 | 2.7 | 1.51 | 9.19E-12    |
| PHF21B       | 5  | 2.7 | 1.04 | 1.03E-09    |
| PLCE1        | 26 | 2.7 | 0.74 | 1.99E-08    |
| PTPN5        | 29 | 2.7 | 0.54 | 0.0000107   |
| TM6SF2       | 7  | 2.7 | 0.24 | 0.0213      |
| ASB9         | X  | 2.6 | 0.1  | 0.0000556   |
| C1QTNF1      | 19 | 2.6 | 5.67 | 5.55E-31    |
| CCBE1        | 24 | 2.6 | 3.09 | 0.000000837 |
| CDCA2        | 8  | 2.6 | 3.68 | 5.04E-31    |
| CENPE        | 6  | 2.6 | 4.43 | 1.23E-40    |
| CHAF1A       | 7  | 2.6 | 3.73 | 9.42E-23    |
| CKS2         | 8  | 2.6 | 3.86 | 1.65E-34    |
| CRYAB        | 15 | 2.6 | 4.89 | 4.69E-33    |
| FANCD2       | 22 | 2.6 | 3.43 | 2.05E-21    |
| GSTT4        | 17 | 2.6 | 0.6  | 0.0000247   |
| IRF7         | 29 | 2.6 | 3.09 | 1.81E-20    |
| LOC100336868 | 16 | 2.6 | 2.44 | 1.51E-14    |
| LOC525353    | 26 | 2.6 | 1.74 | 1.7E-11     |
| LOC539953    | 16 | 2.6 | 3.74 | 7.06E-25    |

|              |    |     |      |             |
|--------------|----|-----|------|-------------|
| PRSS48       | 17 | 2.6 | 0.22 | 0.0000199   |
| PTPN3        | 8  | 2.6 | 2.04 | 1.66E-12    |
| PTPRD        | 8  | 2.6 | 2.87 | 1.22E-12    |
| TLR2         | 17 | 2.6 | 1.42 | 0.000897    |
| TLR4         | 8  | 2.6 | 0.71 | 0.0000135   |
| ACSL5        | 26 | 2.5 | 6.81 | 1.72E-30    |
| BIRC5        | 19 | 2.5 | 4.09 | 3.06E-32    |
| C19H17orf53  | 19 | 2.5 | 0.3  | 0.0000215   |
| C8H9orf100   | 8  | 2.5 | 2.15 | 5.47E-12    |
| CDK1         | 28 | 2.5 | 3.43 | 7.8E-22     |
| CEP55        | 26 | 2.5 | 2.87 | 2.15E-15    |
| CHTF18       | 25 | 2.5 | 2.69 | 2.18E-15    |
| GPRC5A       | 5  | 2.5 | 0.53 | 0.0000205   |
| KIF23        | 10 | 2.5 | 4.08 | 4.91E-36    |
| LOC100336690 | 5  | 2.5 | 2.32 | 1.96E-11    |
| LOC614091    | 23 | 2.5 | 1.76 | 0.00403     |
| LPAR1        | 8  | 2.5 | 0.91 | 0.000445    |
| MCM2         | 22 | 2.5 | 4.75 | 1.32E-20    |
| MCM4         | 27 | 2.5 | 4.1  | 2.62E-20    |
| MCM4         | 14 | 2.5 | 4.02 | 4.19E-20    |
| NR4A2        | 2  | 2.5 | 2.98 | 7.01E-16    |
| TACC3        | 6  | 2.5 | 3.82 | 4.13E-22    |
| ALOX12       | 19 | 2.4 | 0.53 | 0.000832    |
| ANXA8L1      | 28 | 2.4 | 4.31 | 7.6E-23     |
| AQPEP        | 10 | 2.4 | 0.87 | 0.00000168  |
| ATAD5        | 19 | 2.4 | 2.62 | 6.36E-14    |
| BNC2         | 8  | 2.4 | 3.33 | 4.93E-18    |
| BUB1         | 11 | 2.4 | 3.66 | 5.88E-25    |
| CDKN3        | 10 | 2.4 | 2.15 | 3.29E-09    |
| CHD7         | 14 | 2.4 | 1.46 | 0.000042    |
| CKAP2L       | 11 | 2.4 | 3.04 | 2.84E-18    |
| DNA2         | 28 | 2.4 | 1.35 | 0.000000294 |
| FEN1         | 29 | 2.4 | 3.04 | 1.34E-13    |
| ID1          | 13 | 2.4 | 4.97 | 3.19E-35    |
| KIFC1        | 23 | 2.4 | 4.01 | 4.94E-24    |
| MCM8         | 13 | 2.4 | 1.04 | 0.000336    |
| MEOX2        | 4  | 2.4 | 2.43 | 1.99E-08    |
| MFSD7        | 6  | 2.4 | 3.09 | 1.4E-17     |
| PION         | 4  | 2.4 | 1.05 | 0.000216    |
| PRC1         | 21 | 2.4 | 5.04 | 9.7E-35     |
| SFRP2        | 17 | 2.4 | 8.85 | 0.00106     |
| SMC2         | 8  | 2.4 | 4.84 | 5.19E-23    |
| TBX3         | 17 | 2.4 | 2.4  | 3.56E-12    |
| TNIP1        | 7  | 2.4 | 7.23 | 9.02E-12    |
| ACER2        | 8  | 2.3 | 0.58 | 0.0000395   |

|              |    |     |      |             |
|--------------|----|-----|------|-------------|
| ADAMTSL3     | 21 | 2.3 | 1.65 | 0.000000445 |
| CBFA2T3      | 18 | 2.3 | 3.12 | 1.15E-15    |
| CCDC3        | 13 | 2.3 | 4.91 | 2.85E-13    |
| CCDC99       | 20 | 2.3 | 3.31 | 6.06E-15    |
| CD40         | 13 | 2.3 | 4.4  | 2.4E-18     |
| CDCA8        | 3  | 2.3 | 2.85 | 2.8E-14     |
| CDKN2C       | 3  | 2.3 | 1.74 | 1.84E-08    |
| DEPDC1B      | 20 | 2.3 | 1.12 | 0.000000356 |
| E2F1         | 13 | 2.3 | 2.96 | 8.71E-13    |
| FADS1        | 29 | 2.3 | 3.78 | 1.17E-22    |
| FAM111B      | 15 | 2.3 | 2.89 | 2.22E-13    |
| FAM72A       | 16 | 2.3 | 1.27 | 0.000000109 |
| FGF13        | X  | 2.3 | 2.98 | 3.52E-10    |
| FGF7         | 10 | 2.3 | 6.57 | 1.91E-26    |
| FJX1         | 15 | 2.3 | 0.03 | 0.000118    |
| HSD3B1       | 3  | 2.3 | 0.46 | 0.0000727   |
| IL36A        | 11 | 2.3 | 2.61 | 1.68E-11    |
| KIF22        | 25 | 2.3 | 3.71 | 5.03E-21    |
| LOC100848985 | 4  | 2.3 | 1.36 | 0.0000115   |
| MAD2L1       | 6  | 2.3 | 3.24 | 5.68E-17    |
| MCM7         | 25 | 2.3 | 5.4  | 2.76E-20    |
| MFSD6        | 2  | 2.3 | 2.98 | 3.45E-14    |
| NKD2         | 20 | 2.3 | 1.2  | 0.000000301 |
| OAF          | 15 | 2.3 | 3.75 | 3.49E-14    |
| PLA2G4A      | 16 | 2.3 | 5.95 | 1.45E-23    |
| RECQL4       | 14 | 2.3 | 2.2  | 1.38E-08    |
| SKA3         | 12 | 2.3 | 2.92 | 3.31E-16    |
| ST8SIA1      | 5  | 2.3 | 2.97 | 0.000000106 |
| TONSL        | 14 | 2.3 | 2.31 | 5.87E-08    |
| ACSS1        | 13 | 2.2 | 1.46 | 0.0139      |
| ADAMTS17     | 21 | 2.2 | 2.39 | 9.1E-09     |
| ADAMTS5      | 1  | 2.2 | 4.52 | 8.83E-18    |
| BRCA1        | 19 | 2.2 | 3.43 | 2.71E-16    |
| CA2          | 14 | 2.2 | 6.54 | 4.16E-24    |
| CENPN        | 18 | 2.2 | 2.42 | 6.33E-10    |
| CYP1B1       | 11 | 2.2 | 6.37 | 8.94E-13    |
| EPSTI1       | 12 | 2.2 | 3.58 | 5.81E-10    |
| ESM1         | 20 | 2.2 | 6.1  | 3.96E-15    |
| FAM54A       | 9  | 2.2 | 2.93 | 3.99E-12    |
| GATM         | 10 | 2.2 | 1.33 | 0.0000564   |
| GEN1         | 11 | 2.2 | 2.3  | 8.3E-09     |
| GINS2        | 18 | 2.2 | 2.32 | 1.25E-08    |
| GTSE1        | 5  | 2.2 | 3.6  | 1.25E-18    |
| HMGB3        | X  | 2.2 | 0.53 | 0.0000967   |
| KIF20B       | 26 | 2.2 | 2.97 | 7.24E-15    |

|             |    |     |      |             |
|-------------|----|-----|------|-------------|
| LGALS4      | 18 | 2.2 | 0.04 | 0.000443    |
| LIMCH1      | 6  | 2.2 | 1.41 | 0.00843     |
| LOC510844   | 18 | 2.2 | 2.91 | 5.45E-12    |
| LOC783804   | 26 | 2.2 | 0.72 | 0.0000141   |
| MCM10       | 13 | 2.2 | 4.8  | 6.14E-23    |
| MIS18BP1    | 21 | 2.2 | 3.19 | 9.77E-16    |
| NAPRT1      | 14 | 2.2 | 1.78 | 0.000000602 |
| NLRC5       | 18 | 2.2 | 1.49 | 0.000000916 |
| NUF2        | 3  | 2.2 | 3.5  | 3.47E-17    |
| ORC1        | 3  | 2.2 | 2.2  | 0.000000519 |
| PHF19       | 8  | 2.2 | 3.39 | 3.41E-17    |
| PKD2L1      | 26 | 2.2 | 1.42 | 0.000000157 |
| POLA2       | 29 | 2.2 | 2.88 | 3.3E-10     |
| PTPRQ       | 5  | 2.2 | 2.51 | 0.000625    |
| RTP4        | 1  | 2.2 | 2.08 | 0.00000597  |
| TRAIP       | 22 | 2.2 | 0.67 | 0.0000562   |
| TRIP13      | 20 | 2.2 | 3.62 | 1.3E-16     |
| VAT1L       | 18 | 2.2 | 3.63 | 0.00935     |
| WHSC1       | 6  | 2.2 | 4.42 | 2.86E-23    |
| ACVRL1      | 5  | 2.1 | 3.63 | 1.74E-13    |
| ADA         | 13 | 2.1 | 3.7  | 7.67E-11    |
| AHR         | 4  | 2.1 | 2.97 | 1.58E-10    |
| APITD1      | 16 | 2.1 | 3.06 | 1.16E-10    |
| ASAP2       | 11 | 2.1 | 1.32 | 0.0000102   |
| AURKA       | 13 | 2.1 | 3    | 8.16E-12    |
| AVIL        | 5  | 2.1 | 1.15 | 0.0000337   |
| C10H15orf48 | 10 | 2.1 | 3.1  | 0.0000611   |
| C24H18orf54 | 24 | 2.1 | 1.49 | 0.00000973  |
| C3          | 7  | 2.1 | 3.12 | 0.000000174 |
| C5H12orf48  | 5  | 2.1 | 2.19 | 1.66E-08    |
| CD1D        | 3  | 2.1 | 1.3  | 0.000194    |
| CDC25A      | 22 | 2.1 | 3.08 | 1.32E-09    |
| CDC45       | 17 | 2.1 | 3.23 | 1.6E-11     |
| CEACAM1     | 18 | 2.1 | 0.63 | 0.00517     |
| CEP72       | 20 | 2.1 | 1.65 | 0.00000047  |
| CKAP2       | 12 | 2.1 | 5.26 | 2.42E-26    |
| FIGNL1      | 4  | 2.1 | 1.49 | 0.00000115  |
| GINS4       | 27 | 2.1 | 1.99 | 0.00000035  |
| GMNN        | 23 | 2.1 | 3.46 | 1.18E-13    |
| HMMR        | 7  | 2.1 | 4.33 | 2.47E-25    |
| HOMER2      | 21 | 2.1 | 0.99 | 0.0278      |
| IFIH1       | 2  | 2.1 | 2.52 | 0.00053     |
| IL34        | 18 | 2.1 | 3.02 | 6.21E-08    |
| INCENP      | 29 | 2.1 | 3.65 | 9.66E-18    |
| KIF1A       | 3  | 2.1 | 0.37 | 0.00526     |



|              |    |     |      |             |
|--------------|----|-----|------|-------------|
| MASTL        | 13 | 2.1 | 2.56 | 7.12E-10    |
| MIR147       | 10 | 2.1 | 0.89 | 0.000198    |
| MMP19        | 5  | 2.1 | 4.99 | 1.47E-17    |
| MND1         | 17 | 2.1 | 1.51 | 0.00000983  |
| MYO10        | 20 | 2.1 | 6.64 | 3.54E-20    |
| PARVB        | 5  | 2.1 | 3.28 | 4.11E-12    |
| PCNA         | 13 | 2.1 | 5.24 | 1.38E-24    |
| PITPNC1      | 19 | 2.1 | 2.35 | 0.000000283 |
| POLE2        | 10 | 2.1 | 2.31 | 2.76E-08    |
| POLQ         | 1  | 2.1 | 1.97 | 0.000000734 |
| RAI2         | X  | 2.1 | 0.39 | 0.000738    |
| RASGRP2      | 29 | 2.1 | 1.75 | 0.000000214 |
| SKA1         | 24 | 2.1 | 2.51 | 3.92E-10    |
| TOB1         | 19 | 2.1 | 4.06 | 5.06E-10    |
| TPX2         | 13 | 2.1 | 5.37 | 5.53E-23    |
| XAF1         | 19 | 2.1 | 0.29 | 0.014       |
| ARHGAP22     | 28 | 2   | 0.95 | 0.0000935   |
| C1QTNF3      | 20 | 2   | 6.38 | 1.06E-12    |
| C26H10orf131 | 26 | 2   | 0.25 | 0.026       |
| CADPS2       | 4  | 2   | 0.19 | 0.00519     |
| CENPH        | 20 | 2   | 2.03 | 0.000000477 |
| CXCL6        | 6  | 2   | 9.14 | 0.0000181   |
| DDX58        | 8  | 2   | 4.21 | 2.48E-10    |
| HERC6        | 6  | 2   | 4.61 | 1.31E-22    |
| HHAT         | 16 | 2   | 0.5  | 0.00048     |
| KIF18A       | 15 | 2   | 1.92 | 0.00000318  |
| LOC100848128 | 11 | 2   | 1.13 | 0.0000217   |
| LOC100848681 | 18 | 2   | 0.52 | 0.000813    |
| LOC508347    | 3  | 2   | 1.67 | 0.00243     |
| LOC782598    | 21 | 2   | 2.03 | 0.000000766 |
| LOC788634    | 23 | 2   | 2.56 | 0.000539    |
| PALB2        | 25 | 2   | 2.63 | 1.07E-09    |
| PAPSS2       | 26 | 2   | 5.06 | 1.57E-23    |
| PRG4         | 16 | 2   | 1.2  | 0.00417     |
| PRR5L        | 15 | 2   | 4.39 | 4.32E-25    |
| PTGDR        | 10 | 2   | 4.88 | 4.17E-11    |
| STIL         | 3  | 2   | 2.32 | 0.000000062 |
| TREX1        | 22 | 2   | 1.81 | 0.00000259  |
| AHNAK2       | 21 | -2  | 4.26 | 2.51E-15    |
| APOE         | 18 | -2  | 3.12 | 6.54E-12    |
| C27H8orf48   | 27 | -2  | 1.12 | 0.0000169   |
| CH25H        | 26 | -2  | 4.01 | 0.00000474  |
| EGFR         | 22 | -2  | 3.54 | 2.25E-11    |
| FABP3        | 2  | -2  | 4.88 | 4.65E-11    |
| FAT4         | 17 | -2  | 5.96 | 1.02E-17    |

|           |    |      |      |             |
|-----------|----|------|------|-------------|
| KIAA0408  | 9  | -2   | 3.82 | 1.88E-17    |
| LMCD1     | 22 | -2   | 2.82 | 1.23E-10    |
| LOC535166 | 14 | -2   | 4.94 | 0.000000207 |
| LOC783163 | 13 | -2   | 0    | 0.00182     |
| MAP1LC3C  | 16 | -2   | 2.43 | 0.00000329  |
| NTN1      | 19 | -2   | 4.05 | 1.09E-09    |
| OSR1      | 11 | -2   | 2.94 | 3.28E-10    |
| PITX2     | 6  | -2   | 0.36 | 0.00909     |
| SLC9A3R2  | 25 | -2   | 2.05 | 0.00000312  |
| ZNF516    | 24 | -2   | 0.79 | 0.00306     |
| ADAMTS20  | 5  | -2.1 | 4.33 | 1.73E-12    |
| AMIGO2    | 5  | -2.1 | 4.4  | 1.62E-25    |
| ATP8B1    | 24 | -2.1 | 4.06 | 1.55E-19    |
| CCDC88B   | 29 | -2.1 | 0.04 | 0.000291    |
| CD1A      | 3  | -2.1 | 1.28 | 0.0016      |
| COPG2     | 4  | -2.1 | 4.86 | 8.77E-19    |
| DDC       | 4  | -2.1 | 0.92 | 0.0000489   |
| DFNA5     | 4  | -2.1 | 0.62 | 0.000183    |
| EGR1      | 7  | -2.1 | 2.92 | 0.00012     |
| GRAMD1B   | 15 | -2.1 | 0.23 | 0.0262      |
| HSPB8     | 17 | -2.1 | 4.97 | 1.13E-19    |
| JPH2      | 13 | -2.1 | 3.16 | 9.04E-14    |
| MDK       | 15 | -2.1 | 1.13 | 0.00000929  |
| NHSL1     | 9  | -2.1 | 3.47 | 1.99E-12    |
| PCSK1N    | X  | -2.1 | 1.07 | 0.000069    |
| PEG10     | 4  | -2.1 | 3.08 | 1.91E-12    |
| PTK7      | 23 | -2.1 | 6.63 | 4.75E-21    |
| RAPGEF3   | 5  | -2.1 | 1.65 | 0.00000431  |
| RRAGD     | 9  | -2.1 | 0.97 | 0.00011     |
| TMEM132D  | 17 | -2.1 | 4.82 | 1.38E-14    |
| TPPP3     | 18 | -2.1 | 0.86 | 0.0000472   |
| WDR35     | 11 | -2.1 | 5.37 | 4.62E-20    |
| AKAP6     | 21 | -2.2 | 4.63 | 1.23E-11    |
| AMY2B     | 3  | -2.2 | 1.99 | 0.000000088 |
| COL7A1    | 22 | -2.2 | 2.87 | 5.44E-10    |
| CRABP2    | 3  | -2.2 | 6.12 | 1.71E-15    |
| DLL1      | 9  | -2.2 | 0.11 | 0.00205     |
| DSC3      | 24 | -2.2 | 6.97 | 1.93E-18    |
| DUSP10    | 16 | -2.2 | 2.09 | 2.02E-09    |
| FAM131B   | 4  | -2.2 | 1.53 | 0.000263    |
| FNDC1     | 9  | -2.2 | 5.88 | 1.29E-22    |
| FZD1      | 4  | -2.2 | 6.21 | 9.63E-25    |
| HAVCR2    | 7  | -2.2 | 0.2  | 0.00431     |
| HNMT      | 2  | -2.2 | 4.75 | 4.58E-18    |
| IL15      | 17 | -2.2 | 2.44 | 1.57E-08    |

|              |    |      |      |             |
|--------------|----|------|------|-------------|
| INHBA        | 4  | -2.2 | 5.33 | 1.87E-25    |
| KLHL13       | X  | -2.2 | 1.34 | 0.0000193   |
| LOC100847429 | 13 | -2.2 | 5.2  | 2.33E-33    |
| LOC539209    | 18 | -2.2 | 2.7  | 4.17E-11    |
| LOC783891    | 9  | -2.2 | 6.13 | 2.69E-22    |
| PAK1         | 29 | -2.2 | 4.64 | 4.61E-15    |
| PCNXL2       | 28 | -2.2 | 1.68 | 0.00000183  |
| PHLDB2       | 1  | -2.2 | 6.64 | 4.43E-21    |
| SLCO3A1      | 21 | -2.2 | 1.33 | 0.000025    |
| SRPX2        | X  | -2.2 | 3.99 | 6.4E-21     |
| TYRO3        | 10 | -2.2 | 4.49 | 2.8E-29     |
| WFDC1        | 18 | -2.2 | 4.64 | 3.24E-10    |
| C9H6orf174   | 9  | -2.3 | 2.5  | 2.26E-12    |
| DOCK10       | 2  | -2.3 | 4.99 | 2.76E-31    |
| FGF2         | 17 | -2.3 | 5.52 | 4.08E-26    |
| GIPC3        | 7  | -2.3 | 0.42 | 0.000068    |
| HMGA1        | 23 | -2.3 | 4    | 3.73E-23    |
| IGFBP5       | 2  | -2.3 | 5.04 | 0.00000435  |
| LOC100295656 | 19 | -2.3 | 0.56 | 0.000359    |
| MDFI         | 23 | -2.3 | 0.65 | 0.000267    |
| NUDT6        | 17 | -2.3 | 4.7  | 2.92E-23    |
| ODZ4         | 29 | -2.3 | 4.27 | 7.31E-16    |
| SCRN1        | 4  | -2.3 | 2.58 | 5.89E-09    |
| SLC6A9       | 13 | -2.3 | 3.29 | 1.15E-15    |
| FAT3         | 29 | -2.4 | 0.52 | 0.000822    |
| IGDCC4       | 10 | -2.4 | 1.39 | 0.000000388 |
| ISLR         | 21 | -2.4 | 1.54 | 0.011       |
| ITGA6        | 2  | -2.4 | 3.21 | 2.81E-19    |
| KCNJ5        | 29 | -2.4 | 3.59 | 0.000231    |
| LIMS2        | 2  | -2.4 | 3.1  | 3.97E-18    |
| LOC100848933 | 20 | -2.4 | 1.74 | 0.00000782  |
| MMP11        | 17 | -2.4 | 1.8  | 7.85E-09    |
| PIK3CD       | 16 | -2.4 | 0.49 | 0.00003     |
| RNF150       | 17 | -2.4 | 3.44 | 3.4E-20     |
| SLC16A2      | X  | -2.4 | 1.7  | 0.0000341   |
| SPHK1        | 19 | -2.4 | 4.13 | 9.13E-14    |
| ADAMTSL1     | 8  | -2.5 | 2.26 | 0.0000012   |
| BEND6        | 23 | -2.5 | 0.42 | 0.036       |
| C10H5orf13   | 10 | -2.5 | 6.02 | 8.85E-24    |
| COLEC12      | 24 | -2.5 | 0.62 | 0.0000344   |
| FHL1         | X  | -2.5 | 4.16 | 2.68E-39    |
| FNBP1L       | 3  | -2.5 | 2.7  | 4.32E-14    |
| FNDC4        | 11 | -2.5 | 1.98 | 5.39E-11    |
| ITGA9        | 22 | -2.5 | 2.41 | 5.63E-13    |
| NBEA         | 12 | -2.5 | 2    | 5.68E-10    |

|              |    |      |      |             |
|--------------|----|------|------|-------------|
| TMEM8B       | 8  | -2.5 | 0.57 | 0.00863     |
| ADAMTSL1     | 8  | -2.6 | 4.03 | 8.39E-13    |
| C1QTNF6      | 5  | -2.6 | 3.35 | 6.09E-21    |
| CA11         | 18 | -2.6 | 0.42 | 0.00000094  |
| CACNA1H      | 25 | -2.6 | 4.71 | 9.83E-20    |
| CILP2        | 7  | -2.6 | 1.12 | 0.000000164 |
| ELOVL7       | 20 | -2.6 | 4.94 | 3.13E-42    |
| GLRB         | 17 | -2.6 | 2.4  | 0.00000417  |
| GNG7         | 7  | -2.6 | 2.53 | 1.86E-16    |
| JAKMIP2      | 7  | -2.6 | 0.14 | 0.0000101   |
| JAM2         | 1  | -2.6 | 1.95 | 4.03E-10    |
| LOC100847777 | 9  | -2.6 | 0.72 | 0.000000304 |
| MARCKS       | 9  | -2.6 | 3.15 | 3.1E-21     |
| FBXO32       | 14 | -2.7 | 0.5  | 0.000482    |
| LRP1B        | 2  | -2.7 | 3.29 | 0.0000305   |
| MBOAT2       | 11 | -2.7 | 0.1  | 0.00000719  |
| NIPAL1       | 6  | -2.7 | 1.57 | 2.57E-10    |
| RIMKLB       | 5  | -2.7 | 3.55 | 4.99E-24    |
| SMARCA1      | X  | -2.7 | 6.13 | 2.87E-43    |
| TMTC2        | 5  | -2.7 | 5.38 | 8.35E-41    |
| ACTG2        | 11 | -2.8 | 7.52 | 6.36E-33    |
| B3GALNT1     | 1  | -2.8 | 1.14 | 0.00000996  |
| CCDC158      | 6  | -2.8 | 0.11 | 0.000000435 |
| GREM1        | 10 | -2.8 | 5.54 | 5.71E-34    |
| LILRB3       | 18 | -2.8 | 1.58 | 0.00108     |
| LOC787103    | 9  | -2.8 | 2.54 | 2.18E-19    |
| STAC2        | 19 | -2.8 | 0.56 | 0.00000157  |
| TMEM119      | 17 | -2.8 | 6.13 | 2.37E-30    |
| VWA5A        | 29 | -2.8 | 2.74 | 3.08E-08    |
| CRISPLD1     | 14 | -2.9 | 1.72 | 0.000000453 |
| FGD4         | 5  | -2.9 | 2.74 | 1.3E-21     |
| NEURL1B      | 20 | -2.9 | 0.65 | 0.00000601  |
| SRL          | 25 | -2.9 | 1.64 | 3.05E-12    |
| TBXA2R       | 7  | -2.9 | 3.15 | 1.11E-21    |
| CD274        | 8  | -3   | 0.22 | 0.0000401   |
| CDKN2B       | 8  | -3   | 6.04 | 7.02E-33    |
| NOG          | 19 | -3   | 2.06 | 6.22E-14    |
| SPNS2        | 19 | -3   | 1    | 2.63E-08    |
| TRPV2        | 19 | -3   | 0.12 | 0.000000198 |
| B3GALT2      | 16 | -3.1 | 0.94 | 1.7E-10     |
| GLI1         | 5  | -3.1 | 0.37 | 0.0335      |
| PNPLA1       | 23 | -3.1 | 0.84 | 0.0000273   |
| AQP1         | 4  | -3.2 | 7.73 | 2.41E-20    |
| DPT          | 16 | -3.2 | 3.91 | 1.5E-34     |
| MAP2K6       | 19 | -3.2 | 0.92 | 3.25E-10    |

|              |    |      |      |           |
|--------------|----|------|------|-----------|
| MATN3        | 11 | -3.2 | 4.17 | 7.34E-30  |
| PDLIM2       | 8  | -3.2 | 6.04 | 2.73E-40  |
| TRAF5        | 16 | -3.2 | 2.26 | 3.13E-18  |
| TTC39A       | 3  | -3.2 | 1.92 | 1.31E-12  |
| ACTC1        | 10 | -3.3 | 1.11 | 8.64E-14  |
| ADAMTS14     | 28 | -3.3 | 1.32 | 4.26E-12  |
| CCDC102B     | 24 | -3.3 | 1.05 | 6.6E-12   |
| IGF2BP3      | 4  | -3.3 | 3.29 | 9.88E-30  |
| LOC522631    | 24 | -3.3 | 0.26 | 2.11E-09  |
| SEMA3E       | 4  | -3.3 | 2.95 | 7.83E-23  |
| C19H17orf61  | 19 | -3.4 | 3.3  | 0.000106  |
| COL8A2       | 3  | -3.4 | 3.1  | 9.41E-34  |
| GLUL         | 16 | -3.4 | 7.98 | 3.01E-37  |
| GLULP        | 2  | -3.4 | 3.91 | 4.26E-55  |
| LOC100299139 | 24 | -3.4 | 3.47 | 1.93E-42  |
| PTHLH        | 5  | -3.4 | 1.72 | 2.82E-10  |
| SHANK1       | 18 | -3.4 | 1.13 | 3.01E-14  |
| AQP11        | 29 | -3.6 | 0.22 | 1.81E-11  |
| CHN1         | 2  | -3.6 | 5.23 | 7.6E-60   |
| GNAI1        | 4  | -3.7 | 2.48 | 0.0000531 |
| THBD         | 13 | -3.7 | 2.73 | 8.54E-31  |
| WNT11        | 15 | -3.7 | 0.73 | 9.16E-13  |
| FOS          | 10 | -3.8 | 3.95 | 5.91E-58  |
| GZMA         | 20 | -3.8 | 0.32 | 0.0000223 |
| SCN3A        | 2  | -3.8 | 1.93 | 2.36E-09  |
| AGAP2        | 5  | -3.9 | 0.06 | 0.000028  |
| FAM171B      | 2  | -4   | 2.11 | 3.52E-17  |
| LTBP1        | 11 | -4   | 6.91 | 2.38E-61  |
| MGC148692    | 6  | -4   | 0.56 | 5.27E-08  |
| MREG         | 2  | -4   | 2.54 | 4.62E-20  |
| NKX2-2       | 13 | -4.1 | 1.42 | 5.32E-21  |
| SLC7A8       | 10 | -4.1 | 0.01 | 5.85E-10  |
| STK31        | 4  | -4.1 | 0.08 | 0.000027  |
| TRPS1        | 14 | -4.1 | 2.02 | 9.26E-18  |
| FEZ1         | 29 | -4.2 | 0.96 | 6.22E-10  |
| ARHGEF26     | 1  | -4.3 | 1.01 | 8.64E-19  |
| LGI2         | 6  | -4.4 | 0.71 | 0.0000166 |
| LOC517509    | 10 | -4.4 | 1.65 | 5.5E-09   |
| PODN         | 3  | -4.4 | 0.65 | 1.01E-11  |
| ASP          | 19 | -4.6 | 1.4  | 3.54E-20  |
| IGF2BP2      | 1  | -4.6 | 2.77 | 8.87E-20  |
| LMTK3        | 18 | -4.6 | 1.74 | 3.3E-14   |
| GRIK5        | 18 | -4.8 | 0.31 | 4.07E-11  |
| ITGA8        | 13 | -4.9 | 3.38 | 6.57E-49  |
| WNT2B        | 3  | -4.9 | 0.44 | 1.11E-08  |

|              |    |       |      |           |
|--------------|----|-------|------|-----------|
| C16H1orf129  | 16 | -5    | 0.37 | 0.00551   |
| DES          | 2  | -5.1  | 0.4  | 9.06E-15  |
| SORBS2       | 27 | -5.1  | 0.14 | 3.22E-11  |
| PGM5         | 8  | -5.2  | 2.45 | 3.55E-40  |
| ATP6AP1L     | 7  | -5.3  | 3.53 | 5.85E-40  |
| CTNNA2       | 11 | -5.4  | 2.54 | 3.13E-30  |
| TNFSF4       | 16 | -5.4  | 0.93 | 5.59E-18  |
| CXCR4        | 2  | -5.6  | 0.23 | 5.48E-12  |
| SPOCK1       | 7  | -5.7  | 2.85 | 1.28E-19  |
| MUM1L1       | X  | -5.8  | 0.35 | 1.32E-15  |
| BRSK1        | 18 | -5.9  | 0.66 | 6.47E-21  |
| LOC100848949 | 1  | -5.9  | 2.36 | 5.84E-13  |
| TMEM40       | 22 | -6    | 1.48 | 1.46E-25  |
| LOC100848103 | 25 | -6.1  | 2.79 | 4.19E-48  |
| MEST         | 4  | -6.1  | 3.02 | 3.05E-55  |
| HDAC9        | 4  | -6.3  | 1.49 | 1.85E-32  |
| MEGF6        | 16 | -6.5  | 4.22 | 3.16E-141 |
| ADRB2        | 7  | -6.6  | 0.99 | 4.87E-26  |
| POSTN        | 12 | -7.1  | 7.41 | 1.1E-28   |
| SEMA3D       | 4  | -7.1  | 4.99 | 1.35E-41  |
| LOC100847414 | 4  | -7.7  | 4.59 | 9.98E-43  |
| RSPO2        | 14 | -7.9  | 0.45 | 1.16E-15  |
| GDAP1L1      | 13 | -8.4  | 0.71 | 7.61E-26  |
| LOC511130    | X  | -8.9  | 1.38 | 0.0000349 |
| LOC784924    | 4  | -9.1  | 0.27 | 1.03E-25  |
| LOC532218    | 5  | -10   | 3.9  | 0.00096   |
| LOC100847438 | 14 | -10.2 | 0.55 | 0.00274   |
| LOC100848767 | 4  | -11.9 | 1.42 | 7.9E-46   |
| USP43        | 19 | -11.9 | 1.1  | 4E-14     |
| EYA4         | 9  | -21.6 | 2.73 | 1.41E-93  |
| CD200R1L     | 1  | -23.1 | 2.54 | 1.25E-17  |
